# Supplementary material for: DPO and POPOP carboxylate-analog sensors by sequential palladium-catalysed direct arylation of oxazole-4-carboxylates
Source: Royal Society of Chemistry journal article supplement (doi:10.1039/c1ob05261f), 2011-01-01

## Electronic Supplementary Information

# DPO and POPOP Carboxylate-Analogs Sensors by Sequential Palladium-Catalysed Direct Arylation of Oxazole-4-Carboxylates

Cécile Verrier, Catherine Fiol-Petit, Christophe Hoarau\* and Francis Marsais

*Institut de Chimie Organique Fine (IRCOF) associé au CNRS (UMR 6014, COBRA), INSA et Université de Rouen, BP08 76131 Mont Saint Aignan, France*

### Contents

- General & experimental procedures with all spectral data

### General Informations

Dioxane was distilled from benzophenone/Na and toluene was distilled from calcium hydride. Melting points are uncorrected. Column chromatography was performed using silica gel (mesh size 60-80 mesh). <sup>1</sup>H NMR and <sup>13</sup>C NMR spectra were recorded at 300 MHz. Chemical shifts ( $\delta$ ) are given as ppm relative to the residual solvent peak. Microanalyses were carried out at the analytical laboratory of our Department (IRCOF). Commercially available halogenoaromatics, 2-(dicyclohexylphosphino)biphenyl (Cy-JohnPhos Buchwald's ligand), and 1,3-bis-(mesitylimidazolyl)carbene (IMes) were used without further purification.

### UV-visible and fluorescence spectroscopy

UV-visible spectra were obtained on a Varian Cary 50 scan spectrophotometer, in a quartz Suprasil cell (Hellma, 100-QS, 10 x 10 mm, 3500  $\mu$ l). A Cary Eclipse fluorescence spectrophotometer Varian was used to measure the absorption spectra. A 80 Hz xenon flash lamp was used as the excitation source and two Czerny-Turner monochromators; the slit width was 5 nm (10 nm band-pass). Its excitation and emission wavelength range is of 200-

900 nm. Scan rate was 120 nm/min. The excitation light was focused on the sample cell (Hellma, 104F-QS, 10 x 4 mm, 1400  $\mu$ l).

All measurements were made at 25 °C temperature with peltier thermostated cell holder.

The fluorescence quantum yield of the analogs was measured relative to sodium fluorescein in 0.1 M NaOH and distilled water ( $\phi_f = 0.90$ ) at  $\lambda_{exc} = 450$  nm, relative to harmaline in a 0.1 M sulfuric acid and distilled water ( $\phi_f = 0.83$ ) at  $\lambda_{exc} = 360$  nm, relative to Rhodamin 6G in distilled water ( $\phi_f = 0.76$ ) at  $\lambda_{exc} = 488$  nm.

The reproductibility of fluorescence quantum yield was typically  $\pm 10\%$  as described in the literature.

### **General procedure A for synthesis of 5-aryl oxazole-4-carboxylates:**

The 5-aryl oxazole-4-carboxylates were prepared following the Schröder's procedure:<sup>1</sup> A solution of ethyl isocyanoacetate (1.5 g, 13 mmol) in dry THF (8 ml) was added dropwise to a stirred ice-cooled solution of potassium *tert*-butoxyde (1.5 g, 13 mmol) in dry THF (15 ml) under argon. A solution of acyl chloride (13 mmol) in THF (6 ml) was then added dropwise by maintaining the temperature below 0 °C. The resulting mixture was stirred at room temperature during 1 h. An aqueous solution of acetic acid (0.4 ml, 6.5 mmol) was added and the mixture was extracted with Et<sub>2</sub>O. The combined organic extracts were dried (MgSO<sub>4</sub>), concentrated in *vacuo* and the crude product was purified by flash chromatography to afford 5-aryloxazole-4-carboxylates **1a-e**.

### **Ethyl 5-phenyloxazole-4-carboxylate (1a):**

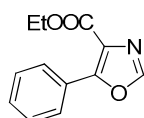

According to the general procedure A using benzoyl chloride (1.5 ml, 13 mmol). Standard workup followed by flash chromatography (EtOAc/PE 4/6, R<sub>f</sub> = 0.35) afforded **1a** (82%) as a white solid (mp < 50 °C). <sup>1</sup>H NMR (CDCl<sub>3</sub>, 300 MHz)  $\delta$  = 1.39 (t, 3H, *J* = 7.2 Hz), 4.41 (q, 2H, *J* = 7.2 Hz), 7.45-7.47 (m, 3H), 7.90 (s, 1H), 8.04-8.07 (m, 2H); <sup>13</sup>C NMR (CDCl<sub>3</sub>, 75 MHz)  $\delta$  = 14.3, 61.5, 126.7, 128.5, 128.6, 130.1, 130.6, 149.1, 155.6, 162.0; IR (KBr)  $\nu$  3109, 2977, 1719, 1583, 1495, 1370, 1226, 1189, 1066, 762, 686, 643 cm<sup>-1</sup>; Anal. Calcd for C<sub>12</sub>H<sub>11</sub>NO<sub>3</sub> (217.2): C, 66.35; H, 5.10; N, 6.45. Found: C, 66.27; H, 5.04; N, 6.58. Spectral data were in agreement with those previously reported.<sup>2</sup>

<sup>1</sup> R. Schröder, U. Schöllkopf, E. Blume, I. Hoppe, *Liebigs Ann. Chem.*, 1975, 533-546.

<sup>2</sup> A. P. Kozikowski, A. Ames, *Tetrahedron*, 1985, **41**, 4821-4834.

### Ethyl 5-(4-cyanophenyl)oxazole-4-carboxylate (**1b**):

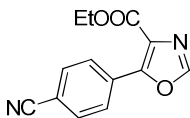

According to the general procedure A using 4-cyanobenzoyl chloride (2.1 g, 13 mmol). Standard workup followed by flash chromatography (EtOAc/PE 4/6, R<sub>f</sub> = 0.23) afforded **1b** (80%) as a white solid (mp = 147-148 °C). <sup>1</sup>H NMR (CDCl<sub>3</sub>, 300 MHz) δ = 1.41 (t, 3H, J = 7.2 Hz), 4.43 (q, 2H, J = 7.2 Hz), 7.75 (d, 2H, J = 8.7 Hz), 7.98 (s, 1H), 8.25 (d, 2H, J = 8.7 Hz); <sup>13</sup>C NMR (CDCl<sub>3</sub>, 75 MHz) δ = 14.3, 62.0, 113.8, 118.3, 128.7, 128.9, 130.8, 132.3, 149.9, 153.2, 161.7; IR (KBr) ν 3136, 2987, 2226, 1719, 1591, 1500, 1076, 1027, 989, 842, 787, 643, 559 cm<sup>-1</sup>; Anal. Calcd for C<sub>13</sub>H<sub>10</sub>N<sub>2</sub>O<sub>3</sub> (242.2): C, 64.46; H, 4.16; N, 11.56. Found: C, 64.35; H, 4.26; N, 11.85. Spectral data were in agreement with those previously reported.<sup>3</sup>

### Ethyl 5-(4-methoxyphenyl)oxazole-4-carboxylate (**1c**):

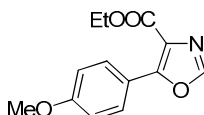

According to the general procedure A using *p*-anisoyl chloride (1.8 ml, 13 mmol). Standard workup followed by flash chromatography (EtOAc/PE 4/6, R<sub>f</sub> = 0.31) afforded **1c** (71%) as a white solid (mp = 70-71 °C). <sup>1</sup>H NMR (CDCl<sub>3</sub>, 300 MHz) δ = 1.41 (t, 3H, J = 7.2 Hz), 3.86 (s, 3H), 4.41 (q, 2H, J = 7.2 Hz), 7.00 (d, 2H, J = 9.0 Hz), 7.85 (s, 1H), 8.07 (d, 2H, J = 9.0 Hz); <sup>13</sup>C NMR (CDCl<sub>3</sub>, 75 MHz) δ = 14.4, 55.5, 61.4, 113.9, 119.3, 125.4, 130.3, 148.5, 155.9, 161.3, 162.3; IR (KBr) ν 3139, 2975, 1694, 1608, 1504, 1182, 1077, 847, 790, 643, 617, 547 cm<sup>-1</sup>; Anal. Calcd for C<sub>13</sub>H<sub>13</sub>NO<sub>4</sub> (247.2): C, 63.15; H, 5.30; N, 5.67. Found: C, 62.84; H, 5.61; N, 6.02.

### Ethyl 5-(4-(dimethylamino)phenyl)oxazole-4-carboxylate (**1d**):

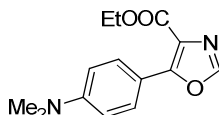

According to the general procedure A using 4-dimethylaminobenzoyl chloride (2.4 g, 13 mmol). Standard workup followed by flash chromatography (EtOAc/PE 4/6, R<sub>f</sub> = 0.29) afforded **1d** (75%) as a white solid (mp = 83-84 °C). <sup>1</sup>H NMR (CDCl<sub>3</sub>, 300 MHz) δ = 1.41 (t, 3H, J = 7.2 Hz), 3.03 (s, 6H), 4.41 (q, 2H, J = 7.2 Hz), 6.74 (d, 2H, J = 9.0 Hz), 7.79 (s, 1H), 8.03 (d, 2H, J = 9.0 Hz); <sup>13</sup>C NMR (CDCl<sub>3</sub>, 75 MHz) δ = 14.3, 39.9, 60.9, 111.1, 113.8,

<sup>3</sup> M. Baumann, I. R. Baxendale, S. V. Ley, C. D. Smith, G. K. Tranmer, *Org. Lett.* 2006, **8**, 5231-5234.

123.6, 129.6, 147.6, 151.3, 156.7, 162.3; IR (KBr)  $\nu$  3125, 2899, 1705, 1608, 1516, 1371, 1181, 1070, 1029, 944, 785, 641  $\text{cm}^{-1}$ ; Anal. Calcd for  $\text{C}_{14}\text{H}_{16}\text{N}_2\text{O}_3$  (260.3): C, 64.60; H, 6.20; N, 10.76. Found: C, 64.82; H, 6.34; N, 10.84.

### Ethyl 5-(pyridin-4-yl)oxazole-4-carboxylate (**1e**)

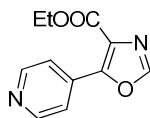

A solution of ethyl isocyanoacetate (6.7 ml, 61.7 mmol) and triethylamine (17.2 ml, 121.3 mmol) was added dropwise to a stirred ice-cooled solution of isonicotinoyl chloride hydrochloride (2.3 g, 13 mmol) in dry THF (40 ml) under argon and the resulting mixture was stirred for 1 h. The solution was refluxed for 24 h, and concentrated *in vacuo*. Then, water (50 ml) was added and the aqueous layer was further extracted with ethyl acetate ( $3 \times 30$  ml). The combined organic layers were dried over  $\text{MgSO}_4$ , filtered and solvent was evaporated. The crude product was purified on silica gel (EtOAc/PE 3/7,  $R_f = 0.22$ ) afforded **1e** (66%) as a white solid (mp = 47-48 °C).  $^1\text{H}$  NMR ( $\text{CDCl}_3$ , 300 MHz)  $\delta = 1.40$  (t, 3H,  $J = 7.1$  Hz), 4.42 (q, 2H,  $J = 7.1$  Hz), 7.98-8.00 (m, 3H), 8.73 (d, 2H,  $J = 6.3$  Hz);  $^{13}\text{C}$  NMR ( $\text{CDCl}_3$ , 75 MHz)  $\delta = 14.2, 61.9, 121.7, 129.4, 133.8, 150.0, 150.4, 152.5, 161.5$ ; IR (KBr)  $\nu$  3094, 2993, 1721, 1584, 1518, 1203, 1103, 824, 788, 693, 624, 515  $\text{cm}^{-1}$ ; Anal. Calcd for  $\text{C}_{11}\text{H}_{10}\text{N}_2\text{O}_3$  (218.2): C, 60.55; H, 4.62; N, 12.84. Found: C, 60.31; H, 4.59; N, 12.64.

### General procedure B for preparation of DPO and POPOP mono(di)carboxylate-analogs:

The direct (hetero)arylation reactions were carried out in a sealed tube at 110 °C for 18 h under argon. A solution of ethyl 5-aryl oxazole-4-carboxylate derivative **1** (0.35 mmol) was allowed to react with arylhalide (0.35-0.7 mmol) with palladium acetate (0.017-0.034 mmol), cesium carbonate (231 mg, 0.7 mmol) and ligand (0.035-0.07 mmol) in the appropriate solvent (1 mL). After filtration on Celite and concentration under *vacuo*, the crude product was purified by flash column chromatography on silica gel using a mixture of ethyl acetate (EtOAc) and petroleum Ether (PE) as eluent to give the DPO (**2-7**) and POPOP (**8**) mono(di)carboxylate-analogs. The following detailed procedures are given using optimized experimental conditions.

### Ethyl 2,5-diphenyl-4-oxazolecarboxylate (**2**)

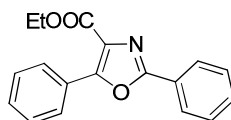

According to the general procedure B using **1a** (76 mg, 0.35 mmol) with 4-iodobenzene (40  $\mu$ L, 0.35 mmol), Pd(OAc)<sub>2</sub>/IMes (4:12 mg, 0.017:0.035 mmol) and dioxane solvent. Standard workup followed by flash chromatography (EtOAc/PE 2/8, R<sub>f</sub> = 0.42) afforded **2** (100%) as a white solid (mp = 86-87 °C). <sup>1</sup>H NMR (CDCl<sub>3</sub>, 300 MHz)  $\delta$  = 1.43 (t, 3H, *J* = 7.0 Hz), 4.47 (q, 2H, *J* = 7.0 Hz), 7.48-7.50 (m, 6H), 8.10-8.17 (m, 4H); <sup>13</sup>C NMR (CDCl<sub>3</sub>, 75 MHz)  $\delta$  = 14.3, 61.6, 126.4, 127.0, 127.2, 128.3, 128.5, 128.6, 128.9, 130.4, 131.2, 155.2, 159.9, 162.4; IR (KBr)  $\nu$  1585, 1716, 2926, 2950, 2975 cm<sup>-1</sup>; Anal. Calcd for C<sub>18</sub>H<sub>15</sub>NO<sub>3</sub> (293.32): C, 73.71; H, 5.15; N, 4.78. Found: C, 73.85; H, 5.11; N, 4.52. Spectral data were in agreement with those previously reported.<sup>4</sup>

### Ethyl [5-(4-cyanophenyl)-2-(4-methoxyphenyl)]oxazole-4-carboxylate (**3a**):

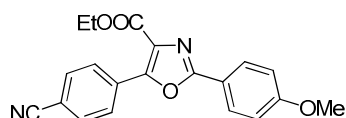

According to the general procedure B using **1b** (86 mg, 0.35 mmol) with 4-iodoanisole (82 mg, 0.35 mmol), Pd(OAc)<sub>2</sub>/IMes (4:12 mg, 0.017:0.035 mmol) and dioxane solvent. Standard workup followed by flash chromatography (EtOAc/PE 4/6, R<sub>f</sub> = 0.42) afforded **3a** (83%) as a white solid (mp = 193-194 °C). <sup>1</sup>H NMR (CDCl<sub>3</sub>, 300 MHz)  $\delta$  = 1.41 (t, 3H, *J* = 7.2 Hz), 3.83 (s, 3H), 4.43 (q, 2H, *J* = 7.2 Hz), 6.95 (d, 2H, *J* = 8.7 Hz), 7.72 (d, 2H, *J* = 8.5 Hz), 8.03 (d, 2H, *J* = 8.7 Hz), 8.24 (d, 2H, *J* = 8.5 Hz); <sup>13</sup>C NMR (CDCl<sub>3</sub>, 75 MHz)  $\delta$  = 14.2, 55.4, 61.8, 113.0, 114.3, 118.4, 128.6, 128.8, 130.2, 131.2, 132.1, 151.9, 160.7, 162.0, 162.2; IR (KBr)  $\nu$  2222, 1708, 1610, 1500, 1370, 1096, 1025, 829, 740 cm<sup>-1</sup>; Anal. Calcd for C<sub>20</sub>H<sub>16</sub>N<sub>2</sub>O<sub>4</sub> (348.4): C, 68.96; H, 4.63; N, 8.04. Found: C, 69.11; H, 4.56; N, 8.19.

### Ethyl [5-(4-cyanophenyl)-2-(4-dimethylaminophenyl)]oxazole-4-carboxylate (**3b**)

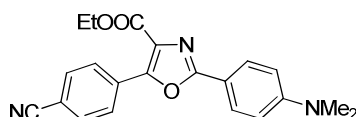

According to the general procedure B using **1b** (86 mg, 0.35 mmol) with 4-bromo-*N,N*-dimethylaniline (71 mg, 0.35 mmol), Pd(OAc)<sub>2</sub>/Cy-JohnPhos (4:12 mg, 0.017:0.035 mmol) and dioxane solvent. Standard workup followed by flash chromatography (EtOAc/PE 4/6,

<sup>4</sup> C. Verrier, T. Martin, C. Hoarau, F. Marsais, *J. Org. Chem.* 2008, **73**, 7383-7386.

R<sub>f</sub> = 0.35) afforded **3b** (92%) as a yellow solid (mp = 191-192 °C). <sup>1</sup>H NMR (CDCl<sub>3</sub>, 300 MHz) δ = 1.42 (t, 3H, *J* = 7.2 Hz), 3.02 (s, 6H), 4.44 (q, 2H, *J* = 7.2 Hz), 6.71 (d, 2H, *J* = 8.7 Hz), 7.71 (d, 2H, *J* = 8.2 Hz), 7.95 (d, 2H, *J* = 8.7 Hz), 8.25 (d, 2H, *J* = 8.2 Hz); <sup>13</sup>C NMR (CDCl<sub>3</sub>, 75 MHz) δ = 14.3, 40.2, 61.8, 111.6, 112.6, 113.3, 128.4, 128.5, 130.2, 131.5, 132.0, 151.2, 152.0, 161.7, 162.3; IR (KBr) ν 2903, 2223, 1711, 1614, 1604, 1509, 1432, 1347, 1317, 1219, 1191, 1099 cm<sup>-1</sup>; Anal. Calcd for C<sub>21</sub>H<sub>19</sub>N<sub>3</sub>O<sub>3</sub> (361.4): C, 69.79; H, 5.30; N, 11.63. Found: C, 69.87; H, 5.26; N, 11.97.

#### Ethyl [2-(4-cyanophenyl)-5-(4-methoxyphenyl)]oxazole-4-carboxylate (**4a**):

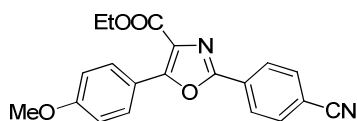

According to the general procedure B using **1c** (85 mg, 0.35 mmol) with 4-iodoanisole (82 mg, 0.35 mmol), Pd(OAc)<sub>2</sub>/P(*o*-tol)<sub>3</sub> (4:11 mg, 0.017:0.035 mmol) and toluene solvent. Standard workup followed by flash chromatography (EtOAc/PE 3/7, R<sub>f</sub> = 0.43) afforded **4a** (94%) as a white solid (mp = 192-193 °C). <sup>1</sup>H NMR (CDCl<sub>3</sub>, 300 MHz) δ = 1.41 (t, 3H, *J* = 6.9 Hz), 3.87 (s, 3H), 4.43 (q, 2H, *J* = 6.9 Hz), 8.64 (d, 2H, *J* = 8.6 Hz), 7.76 (d, 2H, *J* = 8.1 Hz), 8.10 (d, 2H, *J* = 8.6 Hz), 8.23 (d, 2H, *J* = 8.1 Hz); <sup>13</sup>C NMR (CDCl<sub>3</sub>, 75 MHz) δ = 14.4, 55.5, 61.6, 114.0, 114.1, 118.3, 119.1, 127.1, 127.6, 130.3, 130.4, 132.7, 156.4, 157.1, 161.5, 162.1; IR (KBr) ν 2994, 2947, 2837, 2227, 1709, 1610, 1578, 1507 cm<sup>-1</sup>; Anal. Calcd for C<sub>20</sub>H<sub>16</sub>N<sub>2</sub>O<sub>4</sub> (348.4): C, 68.96; H, 4.63; N, 8.04. Found: C, 69.06; H, 4.85; N, 8.21. Spectral data were in agreement with those previously reported.<sup>3</sup>

#### Ethyl [5-(4-methoxyphenyl)-2-(pyridin-4-yl)]oxazole-4-carboxylate (**4b**):

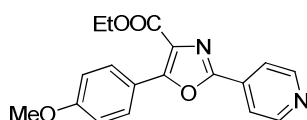

According to the general procedure B using **1c** (88 mg, 0.35 mmol) with 4-bromopyridine.HCl (69 mg, 0.35 mmol), Pd(OAc)<sub>2</sub>/IMes (4:12 mg, 0.017:0.035 mmol) and dioxane solvent. Standard workup followed by flash chromatography (EtOAc/PE 7/3, R<sub>f</sub> = 0.19) afforded **4b** (79%) as a white solid (mp = 145-146 °C). <sup>1</sup>H NMR (CDCl<sub>3</sub>, 300 MHz) δ = 1.39 (t, 3H, *J* = 7.2 Hz), 3.83 (s, 3H), 4.42 (q, 2H, *J* = 7.2 Hz), 6.97 (d, 2H, *J* = 9.0 Hz), 7.93 (d, 2H, *J* = 5.8 Hz), 8.06 (d, 2H, *J* = 9.0 Hz), 8.72 (d, 2H, *J* = 5.8 Hz); <sup>13</sup>C NMR (CDCl<sub>3</sub>, 75 MHz) δ = 14.3, 55.4, 61.6, 114.0, 119.0, 120.2, 127.5, 130.4, 133.4, 150.6, 156.4, 156.7, 161.5, 162.0; IR (KBr) ν 3535, 1709, 1608, 1507, 1263, 1233, 1181, 1099, 1032, 835, 709 cm<sup>-1</sup>; Anal. Calcd for C<sub>18</sub>H<sub>16</sub>N<sub>2</sub>O<sub>4</sub> (324.3): C, 66.66; H, 4.97; N, 8.64. Found: C, 66.48; H, 5.05; N, 8.79.

### Ethyl [2-(4-cyanophenyl)-5-(4-(dimethylamino)phenyl)]oxazole-4-carboxylate (**5a**):

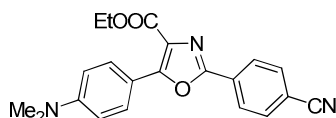

According to the general procedure B using **1d** (92 mg, 0.35 mmol) with 4-iodobenzonitrile (81 mg, 0.35 mmol), Pd(OAc)<sub>2</sub>/IMes (4:12 mg, 0.017:0.035 mmol) and dioxane solvent. Standard workup followed by flash chromatography (EtOAc/PE 4/6, R<sub>f</sub> = 0.39) afforded **5a** (61%) as a yellow solid (mp = 149-150 °C). <sup>1</sup>H NMR (CDCl<sub>3</sub>, 300 MHz) δ = 1.42 (t, 3H, J = 7.1 Hz), 3.04 (s, 6H), 4.44 (q, 2H, J = 7.1 Hz), 6.74 (d, 2H, J = 8.8 Hz), 7.73 (d, 2H, J = 8.2 Hz), 8.05 (d, 2H, J = 8.8 Hz), 8.20 (d, 2H, J = 8.2 Hz); <sup>13</sup>C NMR (CDCl<sub>3</sub>, 75 MHz) δ = 14.4, 40.2, 61.4, 111.3, 113.7, 113.8, 118.4, 126.1, 127.0, 130.0, 130.5, 132.6, 151.6, 156.3, 157.5, 162.4; IR (KBr) ν 2229, 1709, 1610, 1513, 1369, 1218, 1197, 1093, 847, 816 cm<sup>-1</sup>; Anal. Calcd for C<sub>21</sub>H<sub>19</sub>N<sub>3</sub>O<sub>3</sub> (361.4): C, 69.79; H, 5.30; N, 11.63. Found: C, 69.99; H, 5.13; N, 11.58.

### Ethyl [5-(4-(dimethylamino)phenyl)-2-(pyridin-4-yl)]oxazole-4-carboxylate (**5b**):

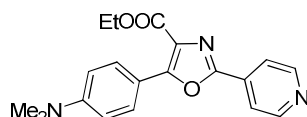

According to the general procedure B using **1d** (92 mg, 0.35 mmol) with 4-bromopyridine.HCl (69 mg, 0.35 mmol), Pd(OAc)<sub>2</sub>/IMes (4:12 mg, 0.017:0.035 mmol) and dioxane solvent. Standard workup followed by flash chromatography (EtOAc/PE 7/3, R<sub>f</sub> = 0.15) afforded **5b** (57%) as a yellow solid (mp = 156-157 °C). <sup>1</sup>H NMR (CDCl<sub>3</sub>, 300 MHz) δ = 1.42 (t, 3H, J = 7.1 Hz), 3.02 (s, 6H), 4.44 (q, 2H, J = 7.1 Hz), 6.72 (d, 2H, J = 9.0 Hz), 7.94 (d, 2H, J = 5.8 Hz), 8.05 (d, 2H, J = 9.0 Hz), 8.72 (d, 2H, J = 5.8 Hz); <sup>13</sup>C NMR (CDCl<sub>3</sub>, 75 MHz) δ = 14.4, 40.0, 61.3, 111.2, 113.6, 120.1, 126.0, 130.0, 133.7, 150.5, 151.7, 155.8, 157.6, 162.3; IR (KBr) ν 3502, 1709, 1608, 1519, 1229, 1196, 1091, 1027, 816, 788, 706 cm<sup>-1</sup>; Anal. Calcd for C<sub>19</sub>H<sub>19</sub>N<sub>3</sub>O<sub>3</sub> (337.4): C, 67.64; H, 5.68; N, 12.46. Found: C, 67.59; H, 5.72; N, 12.53.

### Ethyl [2-(4-methoxyphenyl)-5-(pyridin-4-yl)]oxazole-4-carboxylate (**6a**):

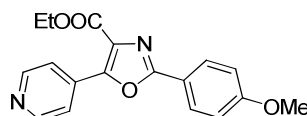

According to the general procedure B using **1e** (78 mg, 0.35 mmol) with 4-iodoanisole (83 mg, 0.35 mmol), Pd(OAc)<sub>2</sub>/IMes (4:12 mg, 0.017:0.035 mmol) and dioxane solvent. Standard workup followed by flash chromatography (EtOAc/PE 7/3, R<sub>f</sub> = 0.21) afforded **6a** (82%) as a white solid (mp = 88-89 °C). <sup>1</sup>H NMR (CDCl<sub>3</sub>, 300 MHz) δ = 1.39 (t, 3H, J = 7.2

Hz), 3.80 (s, 3H), 4.43 (q, 2H,  $J = 7.2$  Hz), 6.93 (d, 2H,  $J = 9.0$  Hz), 7.98-8.04 (m, 4H), 8.70 (d, 2H,  $J = 5.7$  Hz);  $^{13}\text{C}$  NMR ( $\text{CDCl}_3$ , 75 MHz)  $\delta = 14.2, 55.4, 61.8, 118.4, 121.5, 128.8, 130.9, 134.2, 150.2, 151.2, 160.9, 161.9, 162.3$ ; IR (KBr)  $\nu$  3514, 1719, 1614, 1500, 1257, 1107, 840, 743, 702  $\text{cm}^{-1}$ ; Anal. Calcd for  $\text{C}_{18}\text{H}_{16}\text{N}_2\text{O}_4$  (324.3): C, 66.66; H, 4.97; N, 8.64. Found: C, 66.84; H, 4.73; N, 9.06.

### Ethyl [2-(4-(dimethylamino)phenyl)-5-(pyridin-4-yl)]oxazole-4-carboxylate (**6b**):

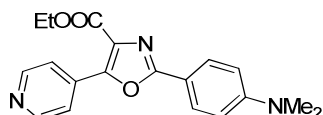

According to the general procedure B using **1e** (78 mg, 0.35 mmol) with 4-bromo-*N,N*-dimethylaniline (71 mg, 0.35 mmol),  $\text{Pd}(\text{OAc})_2/\text{IMes}$  (4:12 mg, 0.017:0.035 mmol) and dioxane solvent. Standard workup followed by flash chromatography (EtOAc/PE 6/4,  $R_f = 0.19$ ) afforded **6b** (45%) as a orange solid (mp = 179-180 °C).  $^1\text{H}$  NMR ( $\text{CDCl}_3$ , 300 MHz)  $\delta = 1.43$  (t, 3H,  $J = 7.1$  Hz), 3.03 (s, 6H), 4.46 (q, 2H,  $J = 7.1$  Hz), 6.70 (d, 2H,  $J = 9.0$  Hz), 7.98 (d, 2H,  $J = 9.0$  Hz), 8.04 (d, 2H,  $J = 6.0$  Hz), 8.72 (d, 2H,  $J = 6.0$  Hz);  $^{13}\text{C}$  NMR ( $\text{CDCl}_3$ , 75 MHz)  $\delta = 14.3, 40.1, 61.8, 111.4, 113.0, 121.5, 128.6, 131.0, 134.6, 150.2, 150.5, 152.3, 162.0, 162.3$ ; IR (KBr)  $\nu$  2972, 2930, 1711, 1611, 1512, 1189, 1104, 819, 741  $\text{cm}^{-1}$ ; Anal. Calcd for  $\text{C}_{19}\text{H}_{19}\text{N}_3\text{O}_3$  (337.4): C, 67.64; H, 5.68; N, 12.46. Found: C, 67.84; H, 5.77; N, 12.40.

### Ethyl [2-(4-chlorophenyl)-5-phenyl]oxazole-4-carboxylate (**7a**):

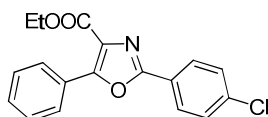

According to the general procedure B using **1a** (77 mg, 0.35 mmol) with 1-chloro-4-iodobenzene (169 mg, 0.70 mmol),  $\text{Pd}(\text{OAc})_2/\text{IMes}$  (4:12 mg, 0.017:0.035 mmol) and dioxane solvent. Standard workup followed by flash chromatography (EtOAc/PE 2/8,  $R_f = 0.37$ ) afforded **7a** (87%) as a white solid (mp = 95-96 °C).  $^1\text{H}$  NMR ( $\text{CDCl}_3$ , 300 MHz)  $\delta = 1.41$  (t, 3H,  $J = 7.1$  Hz), 4.45 (q, 2H,  $J = 7.1$  Hz), 7.44-7.51 (m, 5H), 8.07-8.10 (m, 4H);  $^{13}\text{C}$  NMR ( $\text{CDCl}_3$ , 75 MHz)  $\delta = 14.4, 61.7, 124.9, 127.0, 128.2, 128.4, 128.5, 128.6, 129.2, 130.5, 137.3, 155.4, 158.9, 162.2$ ; IR (KBr)  $\nu$  3515.1, 2925.4, 1721.3, 1606.6, 1484.5  $\text{cm}^{-1}$ ; Anal. Calcd for  $\text{C}_{18}\text{H}_{14}\text{ClNO}_3$  (327.8): C, 65.96; H, 4.31; Cl, 10.82; N, 4.27. Found: C, 65.71; H, 4.56; Cl, 10.95; N, 4.15.



**Ethyl [2-(4-chlorophenyl)-5-(4-cyanophenyl)]oxazole-4-carboxylate (**7b**):**

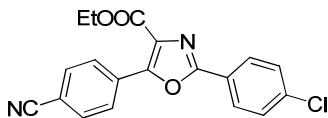

According to the general procedure B using **1b** (86 mg, 0.35 mmol) with 1-chloro-4-iodobenzene (169 mg, 0.70 mmol), Pd(OAc)<sub>2</sub>/IMes (4:12 mg, 0.017:0.035 mmol) and dioxane solvent. Standard workup followed by flash chromatography (EtOAc/PE 2/8, R<sub>f</sub> = 0.26) afforded **7b** (66%) as a white powder (mp = 166-167 °C). <sup>1</sup>H NMR (CDCl<sub>3</sub>, 300 MHz) δ = 1.42 (t, 3H, *J* = 6.9 Hz), 4.45 (q, 2H, *J* = 6.9 Hz), 7.44 (d, 2H, *J* = 8.4 Hz), 7.75 (d, 2H, *J* = 8.4 Hz), 8.05 (d, 2H, *J* = 8.4 Hz), 8.26 (d, 2H, *J* = 8.4 Hz); <sup>13</sup>C NMR (CDCl<sub>3</sub>, 75 MHz) δ = 14.3, 62.0, 113.5, 118.3, 124.3, 128.3, 128.8, 129.3, 130.4, 130.9, 132.2, 137.9, 152.7, 159.7, 161.8; IR (KBr) ν 3514, 2928, 2230, 1719, 1603, 1483, 1239, 1094, 835, 737, 547 cm<sup>-1</sup>; Anal. Calcd for C<sub>19</sub>H<sub>13</sub>ClN<sub>2</sub>O<sub>3</sub> (352.8): C, 64.69; H, 3.71; Cl, 10.05; N, 7.94. Found: C, 64.59; H, 3.54; Cl, 9.87; N, 8.08.

**Ethyl [2-(4-chlorophenyl)-5-(4-methoxyphenyl)]oxazole-4-carboxylate (**7c**):**

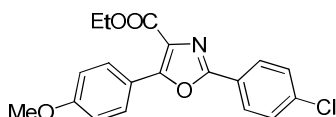

According to the general procedure B using **1c** (88 mg, 0.35 mmol) with 1-chloro-4-iodobenzene (169 mg, 0.70 mmol), Pd(OAc)<sub>2</sub>/IMes (8:24 mg, 0.034:0.07 mmol) and dioxane solvent. Standard workup followed by flash chromatography (EtOAc/PE 3/7, R<sub>f</sub> = 0.40) afforded **7c** (91%) as a white solid (mp = 145-146 °C). <sup>1</sup>H NMR (CDCl<sub>3</sub>, 300 MHz) δ = 1.43 (t, 3H, *J* = 7.1 Hz), 3.88 (s, 3H), 4.45 (q, 2H, *J* = 7.1 Hz), 7.01 (d, 2H, *J* = 9.0 Hz), 7.46 (d, 2H, *J* = 8.7 Hz), 8.06-8.11 (m, 4H); <sup>13</sup>C NMR (CDCl<sub>3</sub>, 75 MHz) δ = 14.5, 55.6, 61.6, 114.0, 119.5, 125.1, 127.2, 128.2, 129.3, 130.4, 137.2, 155.7, 158.4, 161.4, 162.5; IR (KBr) ν 3504, 2977, 1714, 1610, 1507, 1226, 1170, 1000, 834, 734 cm<sup>-1</sup>; Anal. Calcd for C<sub>19</sub>H<sub>16</sub>ClNO<sub>4</sub> (357.8): C, 63.78; H, 4.51; Cl, 9.91; N, 3.91. Found: C, 63.80; H, 4.58; Cl, 9.84; N, 4.08.

**Ethyl [2-(4-chlorophenyl)-5-(4-(dimethylamino)phenyl)]oxazole-4-carboxylate (**7d**):**

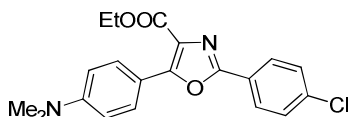

According to the general procedure B using **1d** (92 mg, 0.35 mmol) with 1-chloro-4-iodobenzene (169 mg, 0.70 mmol), Pd(OAc)<sub>2</sub>/IMes (8:24 mg, 0.034:0.07 mmol) and dioxane solvent. Standard workup followed by flash chromatography (EtOAc/PE 3/7, R<sub>f</sub> = 0.40) afforded **7d** (90%) as a white solid (mp > 260 °C). <sup>1</sup>H NMR (CDCl<sub>3</sub>, 300 MHz) δ = 1.43 (t, 3H, *J* = 7.2 Hz), 3.04 (s, 6H), 4.45 (q, 2H, *J* = 7.2 Hz), 6.75 (d, 2H, *J* = 8.7 Hz), 7.44 (d, 2H, *J*

= 8.1 Hz), 8.04-8.07 (m, 4H);  $^{13}\text{C}$  NMR ( $\text{CDCl}_3$ , 75 MHz)  $\delta$  = 14.5, 40.2, 61.3, 111.3, 114.2, 125.3, 125.7, 128.0, 129.1, 129.9, 136.8, 151.6, 156.8, 157.5, 162.7; IR (KBr)  $\nu$  1711, 1614, 1515, 1197, 1086, 817, 731  $\text{cm}^{-1}$ ; Anal. Calcd for  $\text{C}_{20}\text{H}_{19}\text{ClN}_2\text{O}_3$  (370.8): C, 64.78; H, 5.16; Cl, 9.56; N, 7.55. Found: C, 64.93; H, 5.31; Cl, 9.44; N, 7.83.

### Ethyl [2-(4-chlorophenyl)-5-(pyridin-4-yl)oxazole-4-carboxylate (**7e**):

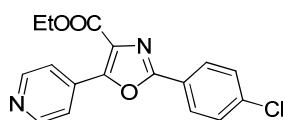

According to the general procedure B using **1e** (78 mg, 0.35 mmol) with 1-chloro-4-iodobenzene (169 mg, 0.70 mmol),  $\text{Pd}(\text{OAc})_2/\text{IMes}$  (4:12 mg, 0.017:0.035 mmol) and dioxane solvent. Standard workup followed by flash chromatography (EtOAc/PE 6/4,  $R_f$  = 0.32) afforded **7e** (78%) as a white solid (mp = 87-88 °C).  $^1\text{H}$  NMR ( $\text{CDCl}_3$ , 300 MHz)  $\delta$  = 1.43 (t, 3H,  $J$  = 7.1 Hz), 4.47 (q, 2H,  $J$  = 7.1 Hz), 7.46 (d, 2H,  $J$  = 8.4 Hz), 8.03 (d, 2H,  $J$  = 6.0 Hz), 8.07 (d, 2H,  $J$  = 8.4 Hz), 8.75 (d, 2H,  $J$  = 6.0 Hz);  $^{13}\text{C}$  NMR ( $\text{CDCl}_3$ , 75 MHz)  $\delta$  = 14.4, 62.1, 121.7, 124.4, 128.4, 129.4, 131.2, 134.0, 138.0, 150.4, 152.1, 160.0, 161.8; IR (KBr)  $\nu$  1720, 1602, 1583, 1482, 1091, 835, 735, 694, 495  $\text{cm}^{-1}$ ; Anal. Calcd for  $\text{C}_{17}\text{H}_{13}\text{ClN}_2\text{O}_3$  (328.7): C, 62.11; H, 3.99; Cl, 10.78; N, 8.52. Found: C, 62.04; H, 4.22; Cl, 10.86; N, 8.64.

### POPOP dicarboxylate-analog **8a**:

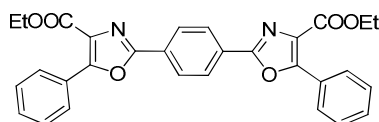

According to the general procedure B using **1a** (77 mg, 0.35 mmol) with **7a** (232 mg, 0.70 mmol),  $\text{Pd}(\text{OAc})_2/\text{Cy-JohnPhos}$  Buchwald's ligand (4:12 mg, 0.017:0.035 mmol) and dioxane solvent. Standard workup followed by flash chromatography (EtOAc/PE 4/6,  $R_f$  = 0.35) afforded **8a** (22%) as a white solid.  $^1\text{H}$  NMR ( $\text{CDCl}_3$ , 300 MHz)  $\delta$  = 1.43 (t, 3H,  $J$  = 7.2 Hz), 4.47 (q, 4H,  $J$  = 7.2 Hz), 7.50-7.52 (m, 6H), 8.12-8.14 (m, 4H), 8.29 (s, 4H).

### POPOP dicarboxylate-analog **8b**:

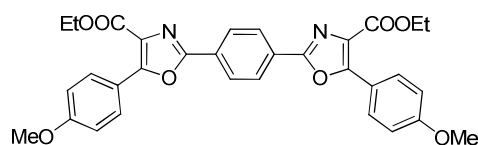

According to the general procedure B using **1c** (88 mg, 0.35 mmol) with **7c** (254 mg, 0.70 mmol),  $\text{Pd}(\text{OAc})_2/\text{Cy-JohnPhos}$  Buchwald's ligand (4:12 mg, 0.017:0.035 mmol) and dioxane solvent. Standard workup followed by flash chromatography (EtOAc/PE 4/6,  $R_f$  = 0.24)

afforded **8b** (98%) as a white solid (mp > 260 °C). <sup>1</sup>H NMR (CDCl<sub>3</sub>, 300 MHz) δ = 1.44 (t, 6H, *J* = 7.1 Hz), 3.89 (s, 6H), 4.47 (q, 4H, *J* = 7.1 Hz), 7.03 (d, 4H, *J* = 8.7 Hz), 8.13 (d, 4H, *J* = 8.7 Hz), 8.25 (s, 4H); <sup>13</sup>C NMR (CDCl<sub>3</sub>, 75 MHz) δ = 14.4, 55.5, 61.6, 114.0, 119.5, 127.2, 127.4, 128.4, 130.4, 155.9, 158.4, 161.4, 162.4; IR (KBr) ν 2971, 2841, 1713, 1609, 1578, 1504, 1220, 1178, 1033, 833, 787, 711, 648 cm<sup>-1</sup>; Anal. Calcd for C<sub>32</sub>H<sub>28</sub>N<sub>2</sub>O<sub>8</sub> (568.6): C, 67.60; H, 4.96; N, 4.93. Found: C, 67.48; H, 5.24; N, 5.11.

### POPOP dicarboxyalte-analog **8c**:

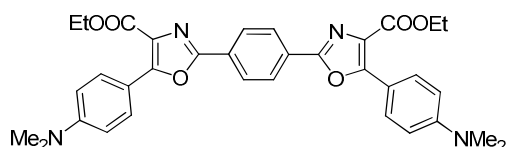

According to the general procedure B using **1d** (92 mg, 0.35 mmol) with **7d** (263 mg, 0.70 mmol), Pd(OAc)<sub>2</sub>/Cy-JohnPhos Buchwald's ligand (4:12 mg, 0.017:0.035 mmol) and dioxane solvent. Standard workup followed by flash chromatography (EtOAc/PE 6/4, R<sub>f</sub> = 0.32) afforded **8c** (99%) as a yellow solid (decomposition 180 °C). <sup>1</sup>H NMR (CDCl<sub>3</sub>, 300 MHz) δ = 1.45 (t, 6H, *J* = 7.1 Hz), 3.06 (s, 12H), 4.47 (q, 4H, *J* = 7.1 Hz), 6.77 (d, 4H, *J* = 8.7 Hz), 8.10 (d, 4H, *J* = 8.7 Hz), 8.23 (s, 4H); <sup>13</sup>C NMR (CDCl<sub>3</sub>, 75 MHz) δ = 14.5, 40.2, 61.4, 111.4, 114.3, 126.0, 127.0, 128.4, 130.0, 151.7, 157.1, 157.7, 162.8; IR (KBr) ν 2929, 1717, 1610, 1560, 1513 cm<sup>-1</sup>; Anal. Calcd for C<sub>34</sub>H<sub>34</sub>N<sub>4</sub>O<sub>6</sub> (594.7): C, 68.67; H, 5.76; N, 9.42. Found: C, 68.59; H, 5.66; N, 9.58.

### POPOP dicarboxyalte-analog **8d**:

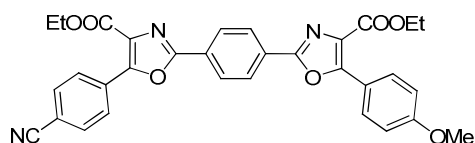

According to the general procedure B using **1b** (86 mg, 0.35 mmol) with **7c** (254 mg, 0.70 mmol), Pd(OAc)<sub>2</sub>/Cy-JohnPhos Buchwald's ligand (4:12 mg, 0.017:0.035 mmol) and dioxane solvent. Standard workup followed by flash chromatography (EtOAc/PE 5/5, R<sub>f</sub> = 0.38) afforded **8d** (86%) as a yellow solid (mp = 241-242 °C). <sup>1</sup>H NMR (CDCl<sub>3</sub>, 300 MHz) δ = 1.39-1.45 (m, 6H), 3.84 (s, 3H), 4.39-4.49 (m, 4H), 6.97 (d, 2H, *J* = 9.0 Hz), 7.75 (d, 2H, *J* = 8.4 Hz), 8.07 (d, 2H, *J* = 9.0 Hz), 8.18 (s, 4H), 8.27 (d, 2H, *J* = 8.4 Hz); <sup>13</sup>C NMR (CDCl<sub>3</sub>, 75 MHz) δ = 14.3, 14.4, 55.4, 61.5, 62.1, 113.5, 113.9, 118.3, 119.2, 127.1, 127.3, 127.4, 127.5, 128.9, 130.3, 130.6, 130.8, 132.2, 152.9, 155.9, 157.9, 159.7, 161.4, 161.8, 162.2; IR (KBr) ν 2984, 2840, 2227, 1715, 1608, 1578, 1560, 1506 cm<sup>-1</sup>; Anal. Calcd for C<sub>32</sub>H<sub>25</sub>N<sub>3</sub>O<sub>7</sub> (563.6): C, 68.20; H, 4.47; N, 7.46. Found: C, 68.14; H, 4.58; N, 7.49.

### POPOP dicarboxyalte-analog **8e**:

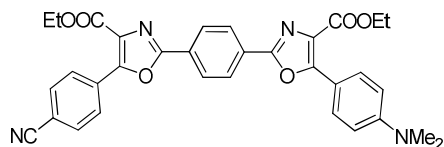

According to the general procedure B using **1b** (86 mg, 0.35 mmol) with **7d** (263 mg, 0.70 mmol), Pd(OAc)<sub>2</sub>/Cy-JohnPhos Buchwald's ligand (4:12 mg, 0.017:0.035 mmol) and dioxane solvent. Standard workup followed by flash chromatography (EtOAc/PE 5/5, R<sub>f</sub> = 0.33) afforded **8e** (95%) as a yellow solid (mp = 244-245 °C). <sup>1</sup>H NMR (CDCl<sub>3</sub>, 300 MHz) δ = 1.43 (m, 6H), 3.01 (s, 6H), 4.45 (m, 4H), 6.70 (d, 2H, *J* = 8.5 Hz), 7.74 (d, 2H, *J* = 8.1 Hz), 8.04 (d, 2H, *J* = 8.5 Hz), 8.16 (s, 4H), 8.27 (d, 2H, *J* = 8.1 Hz); <sup>13</sup>C NMR (CDCl<sub>3</sub>, 75 MHz) δ = 14.3, 14.4, 40.1, 61.3, 62.0, 111.2, 113.4, 113.9, 118.3, 125.8, 126.9, 127.1, 127.2, 128.8, 129.1, 129.8, 130.5, 130.8, 132.2, 151.4, 152.8, 157.0, 159.7, 161.8, 162.5; IR (KBr) ν 2980, 2926, 2226, 1715, 1608, 1512 cm<sup>-1</sup>; Anal. Calcd for C<sub>33</sub>H<sub>28</sub>N<sub>4</sub>O<sub>6</sub> (576.6): C, 68.74; H, 4.89; N, 9.72. Found: C, 68.63; H, 5.02; N, 9.91.

### POPOP dicarboxyalte-analog **8f**:

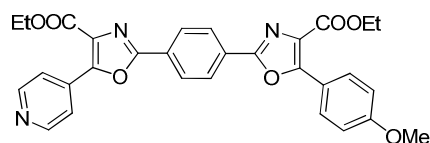

According to the general procedure B using **1e** (78 mg, 0.35 mmol) with **7c** (254 mg, 0.70 mmol), Pd(OAc)<sub>2</sub>/Cy-JohnPhos Buchwald's ligand (4:12 mg, 0.017:0.035 mmol) and dioxane solvent. Standard workup followed by flash chromatography (EtOAc/PE 7/3, R<sub>f</sub> = 0.19) afforded **8f** (92%) as a yellow powder (mp = 225-226 °C). <sup>1</sup>H NMR (CDCl<sub>3</sub>, 300 MHz) δ = 1.39-1.47 (m, 6H), 3.86 (s, 3H), 4.41-4.52 (m, 4H), 6.99 (d, 2H, *J* = 9.0 Hz), 8.06-8.11 (m, 4H), 8.23 (s, 4H), 8.78 (s, 2H); <sup>13</sup>C NMR (CDCl<sub>3</sub>, 75 MHz) δ = 14.3, 14.4, 55.5, 61.6, 62.2, 113.9, 119.3, 121.9, 127.2, 127.4, 127.6, 129.1, 130.4, 131.4, 134.1, 150.3, 152.2, 156.0, 158.0, 160.1, 161.4, 161.7, 162.3; IR (KBr) ν 2977, 1715, 1609, 1578, 1542, 1505 cm<sup>-1</sup>; Anal. Calcd for C<sub>30</sub>H<sub>25</sub>N<sub>3</sub>O<sub>7</sub> (539.5): C, 66.78; H, 4.67; N, 7.79. Found: C, 66.84; H, 4.87; N, 7.62.

### POPOP dicarboxyalte-analog (**8g**)

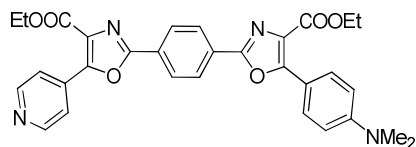

According to the general procedure B using **1e** (78 mg, 0.35 mmol) with **7d** (263 mg, 0.70 mmol), Pd(OAc)<sub>2</sub>/Cy-JohnPhos Buchwald's ligand (4:12 mg, 0.017:0.035 mmol) and dioxane solvent. Standard workup followed by flash chromatography (EtOAc/PE 7/3, R<sub>f</sub> = 0.16) afforded **8g** (98%) as a yellow powder (mp = 180-181 °C). <sup>1</sup>H NMR (CDCl<sub>3</sub>, 300 MHz) δ = 1.41-1.48 (m, 6H), 3.04 (s, 6H), 4.42-4.51 (m, 4H), 6.75 (d, 2H, *J* = 9 Hz), 8.06 (m, 4H), 8.24 (s, 4H), 8.78 (s, 2H); <sup>13</sup>C NMR (CDCl<sub>3</sub>, 75 MHz) δ = 14.4, 14.5, 40.2, 61.4, 62.2, 111.3, 114.0, 121.8, 126.0, 127.1, 127.3, 127.4, 129.4, 129.9, 131.4, 134.1, 150.4, 151.7, 152.3, 157.2, 160.2, 161.8, 162.6; IR (KBr) ν 2928, 1719, 1609, 1511 cm<sup>-1</sup>; Anal. Calcd for C<sub>31</sub>H<sub>28</sub>N<sub>4</sub>O<sub>6</sub> (552.6): C, 67.38; H, 5.11; N, 10.14. Found: C, 67.48; H, 4.86; N, 10.27.

Supplementary Material (ESI) for Chemical Communications  
This journal is © The Royal Society of Chemistry 2010

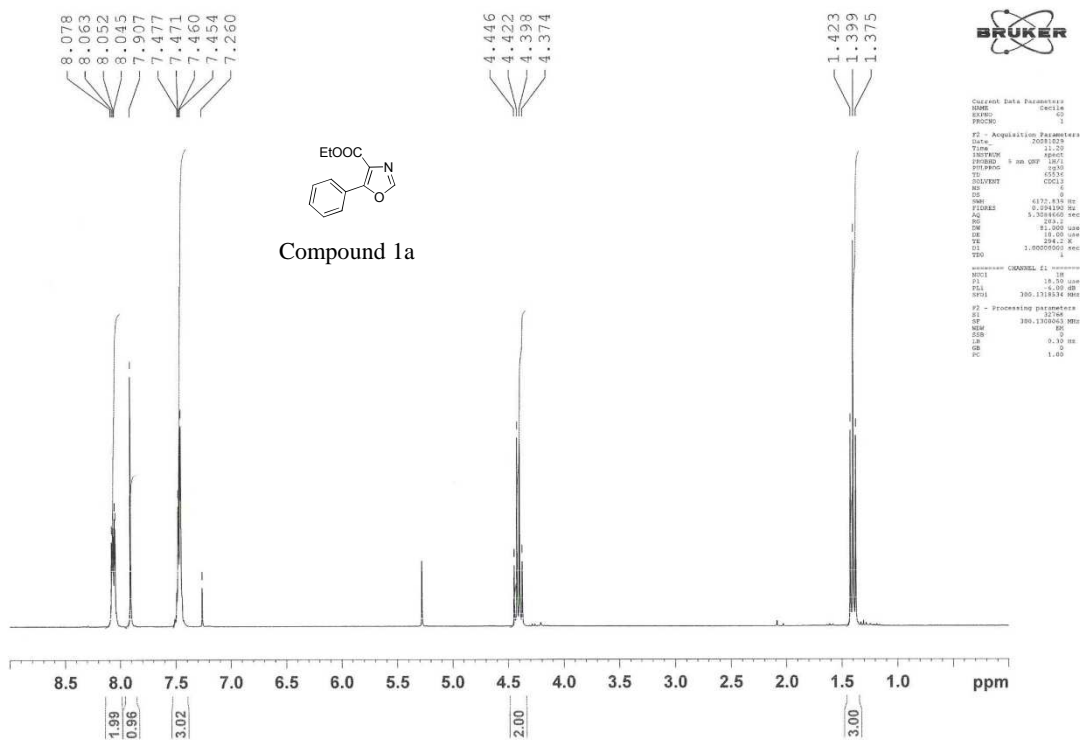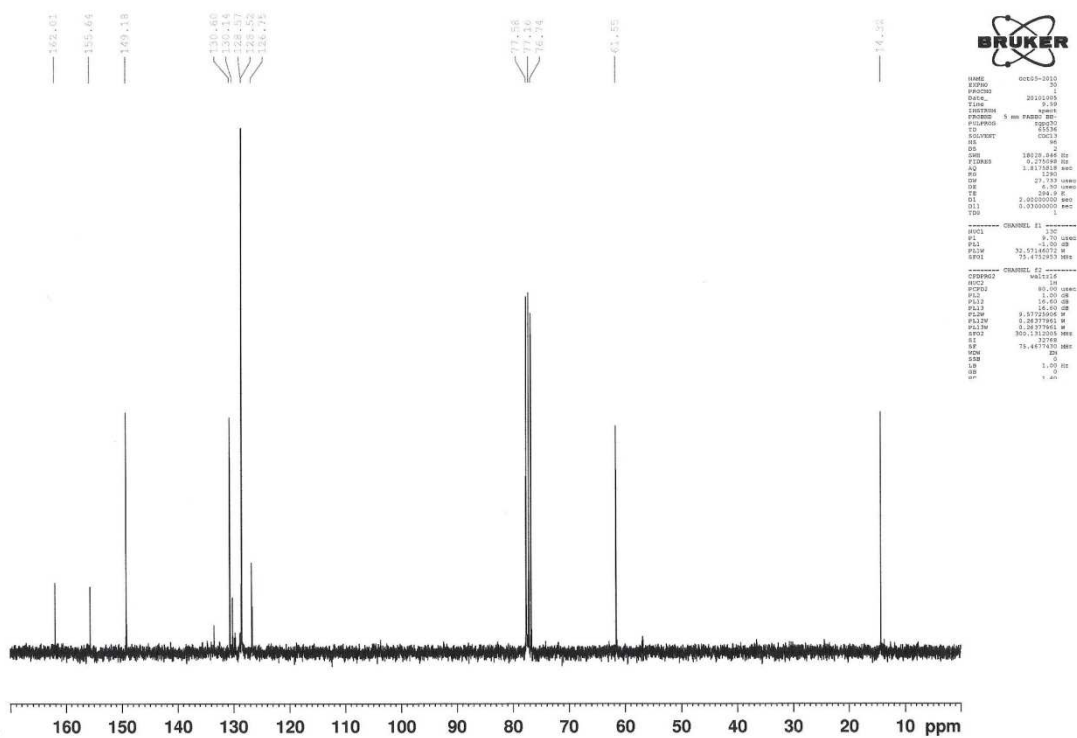

Supplementary Material (ESI) for Chemical Communications  
 This journal is © The Royal Society of Chemistry 2010

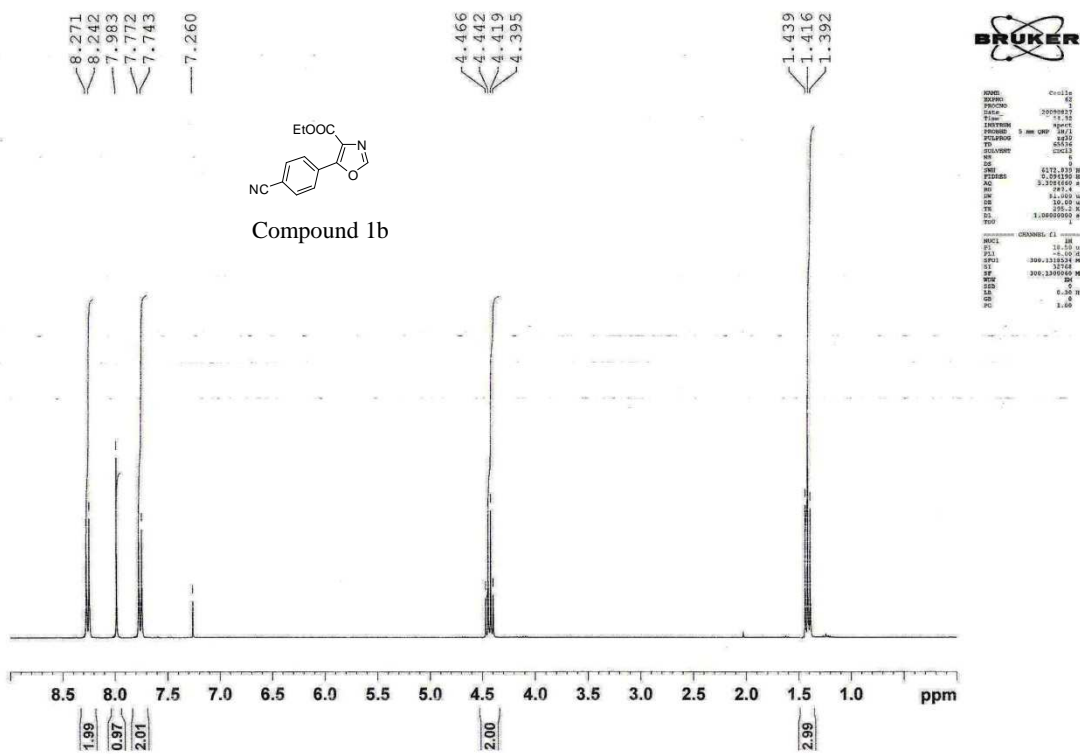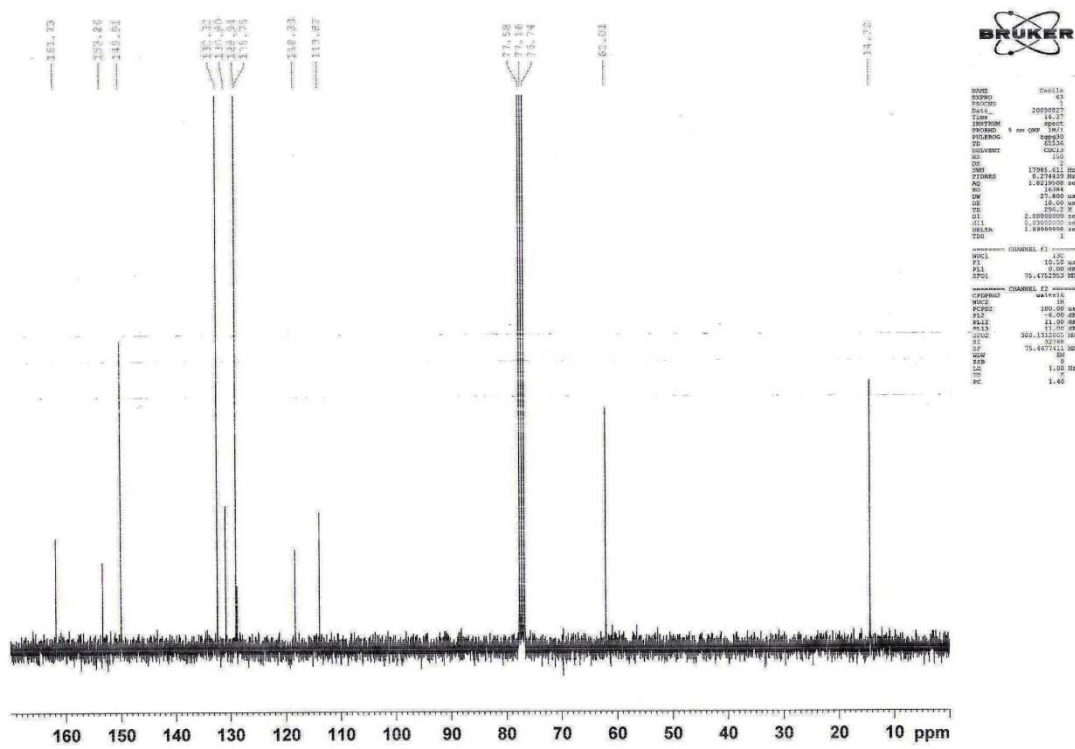

Supplementary Material (ESI) for Chemical Communications  
This journal is © The Royal Society of Chemistry 2010

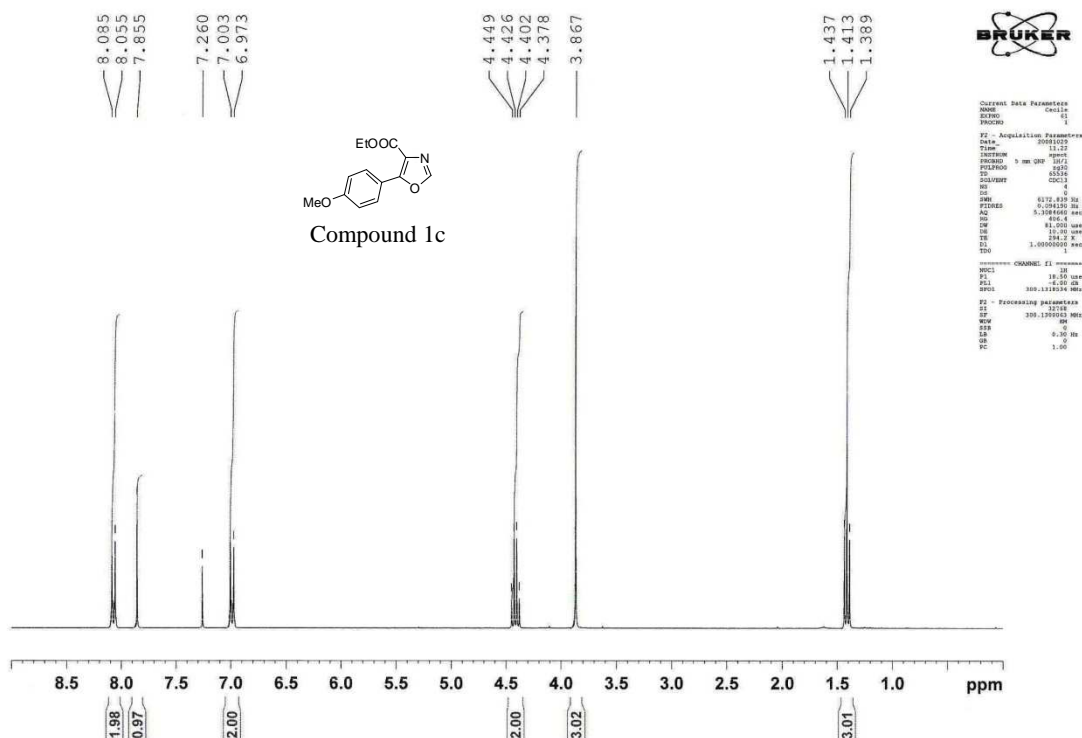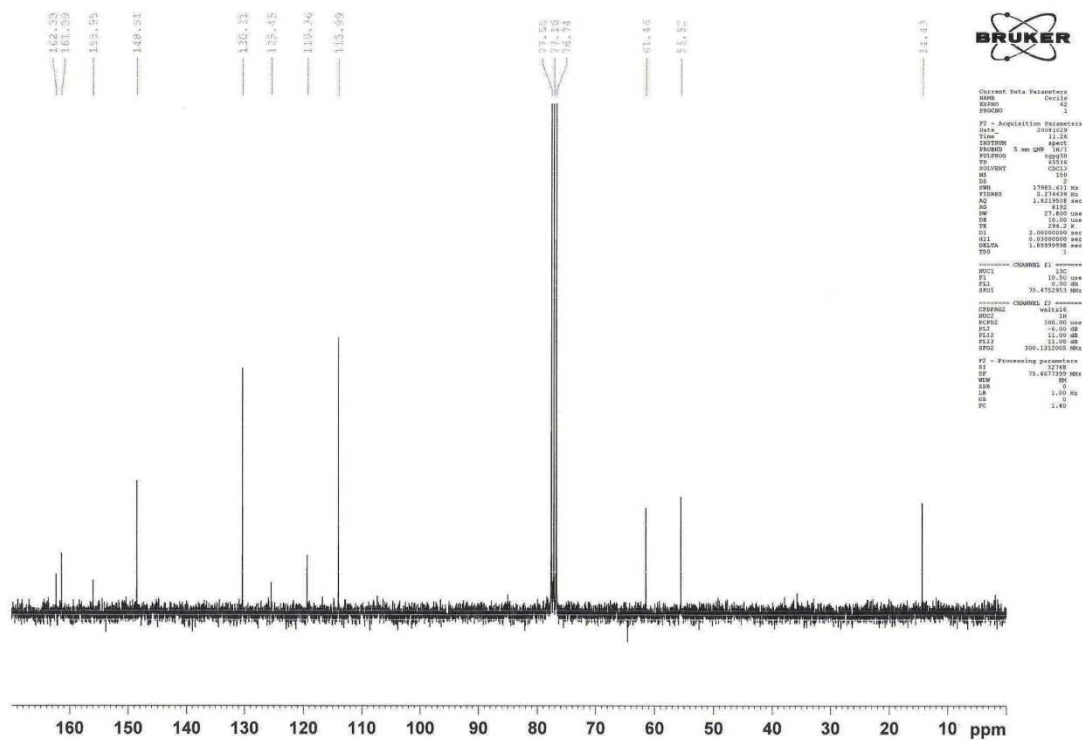



Supplementary Material (ESI) for Chemical Communications  
This journal is © The Royal Society of Chemistry 2010

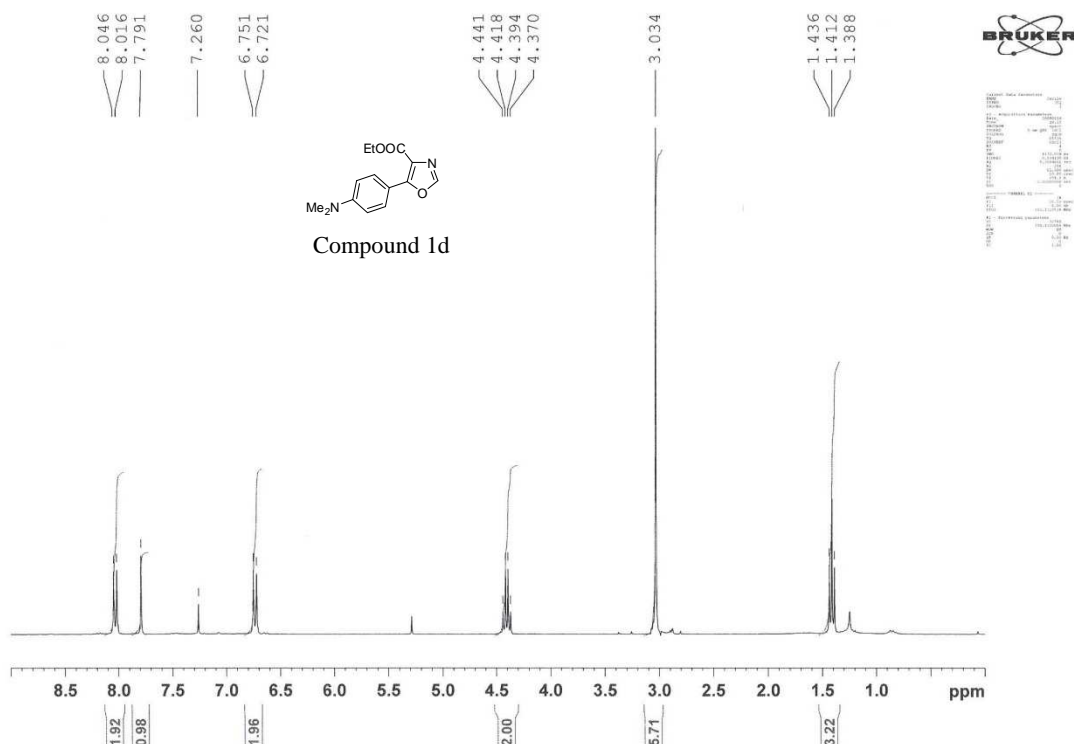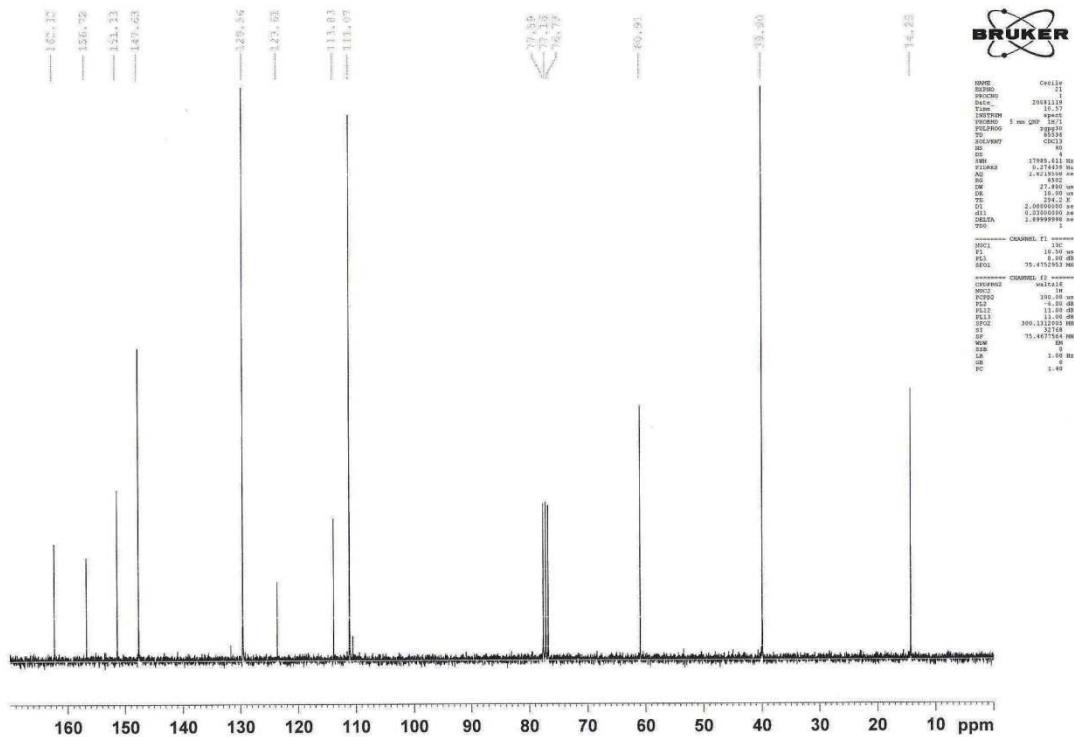

Supplementary Material (ESI) for Chemical Communications  
This journal is © The Royal Society of Chemistry 2010

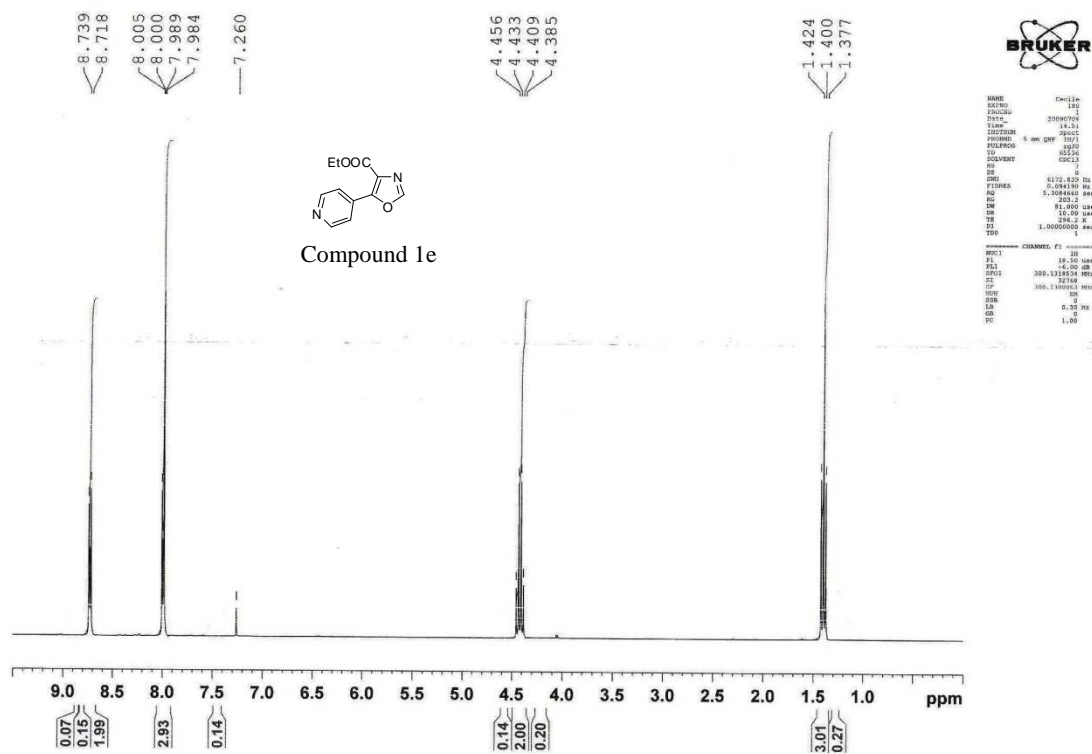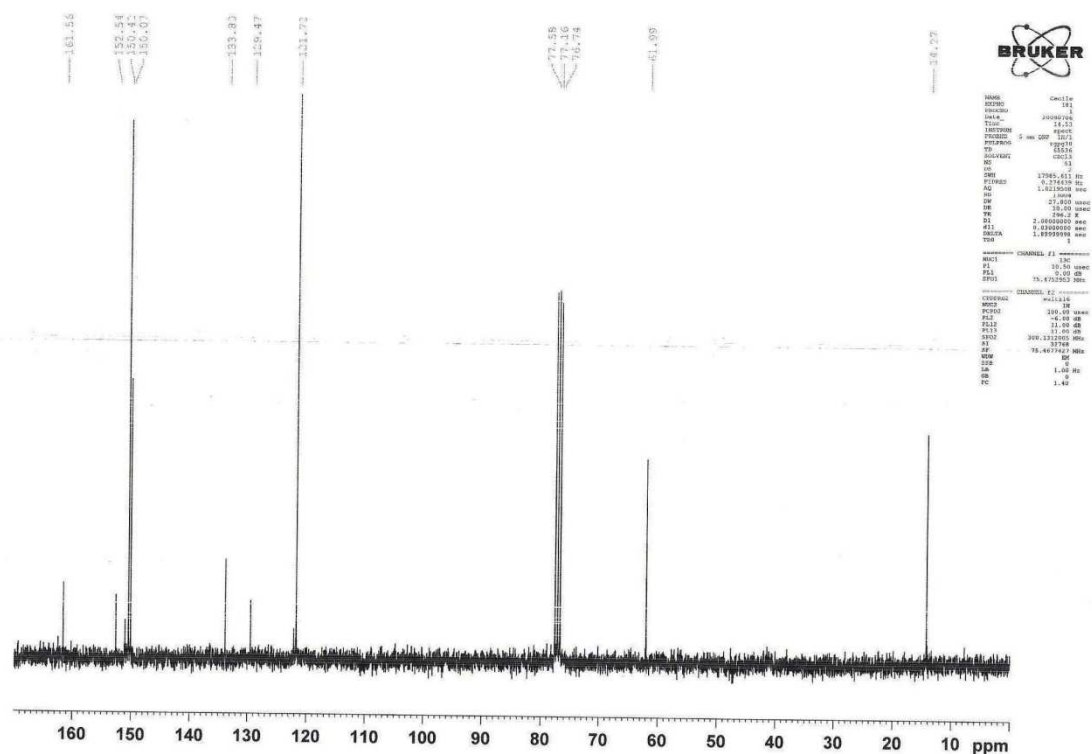

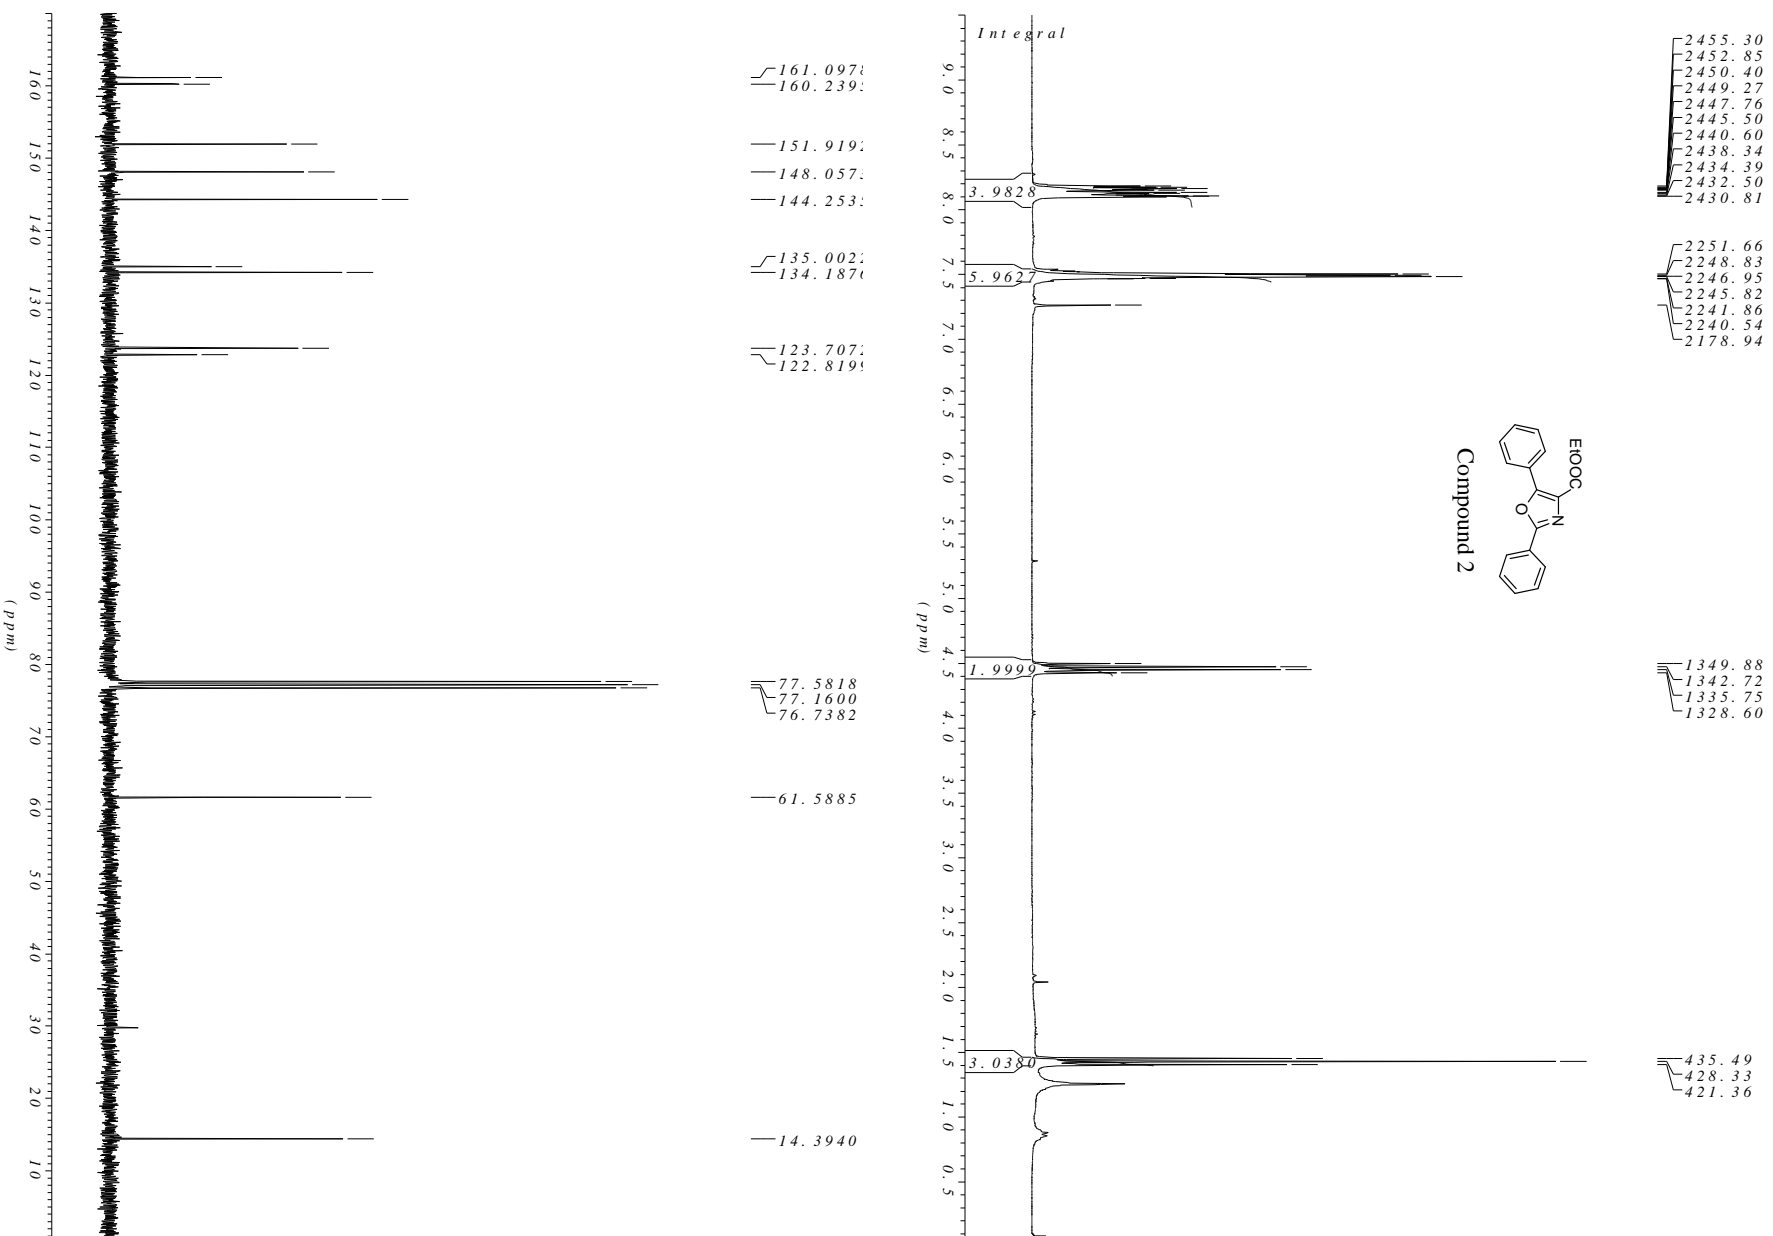

Supplementary Material (ESI) for Chemical Communications  
This journal is © The Royal Society of Chemistry 2010

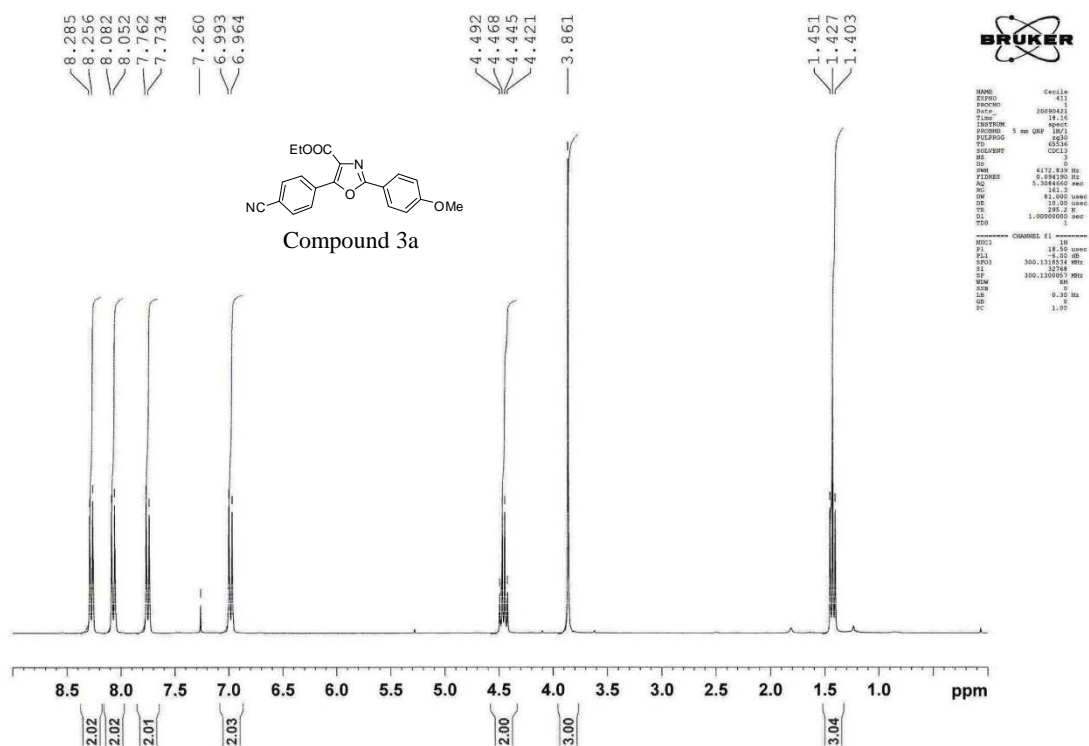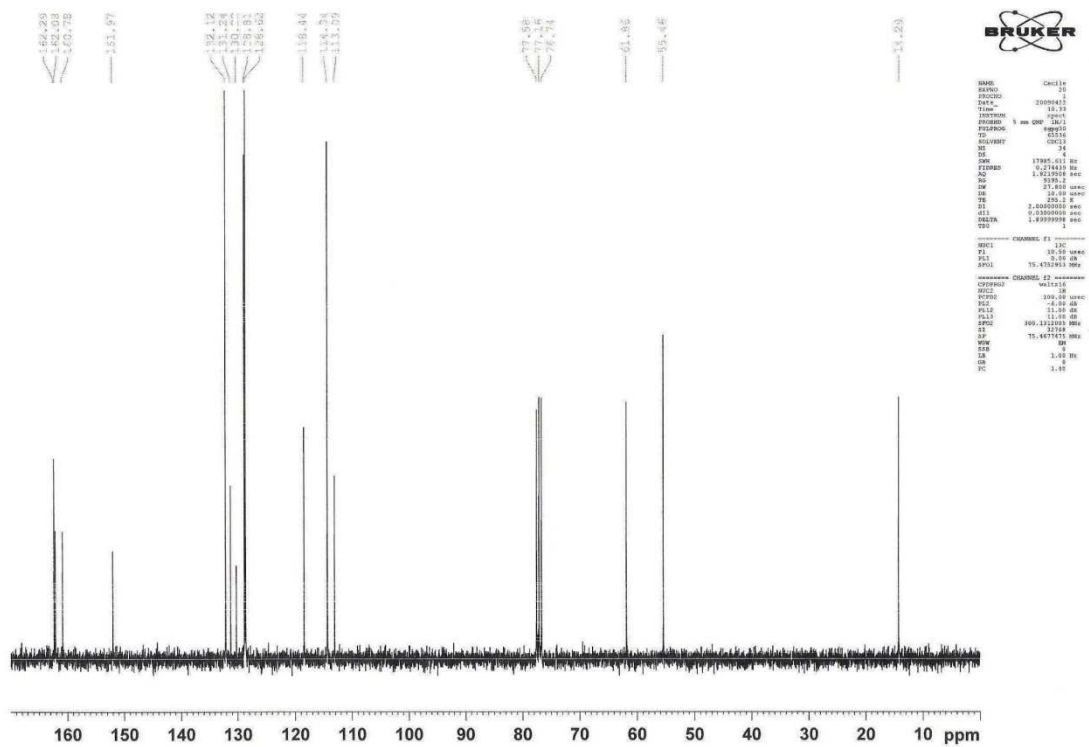



Supplementary Material (ESI) for Chemical Communications  
 This journal is © The Royal Society of Chemistry 2010

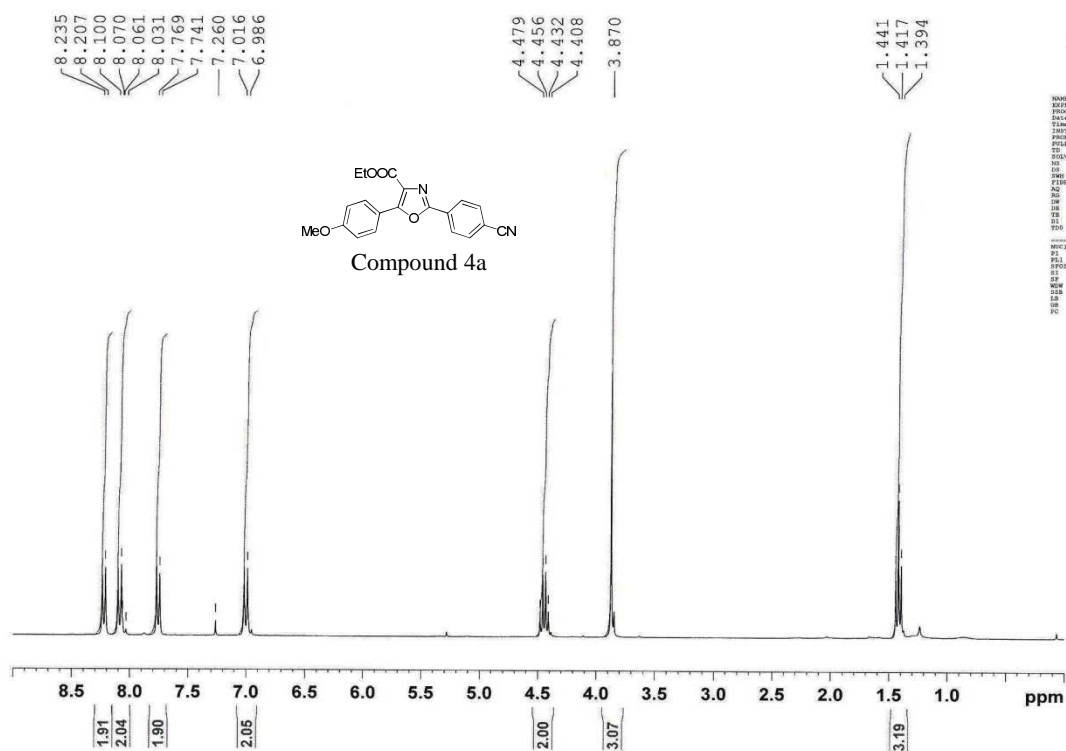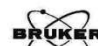

```

NAME: Cnc11a
EXPNO: 1
PROCNO: 1
F2: 20090210
TIME: 19.20
INSTRUM: spect
PULPROG: zgpg30
TD: 65536
SOLVENT: CDCl3
NS: 2048
DS: 4
SWH: 6172.430 Hz
FIDRES: 0.204150 Hz
AQ: 0.3384600 sec
RG: 184.0
DE: 1.000000 sec
TE: 300.2 K
SI: 32768
SF: 300.136053 MHz
WDW: EM
SSB: 0
LB: 0.30 Hz
GB: 0
PC: 1.50
    
```

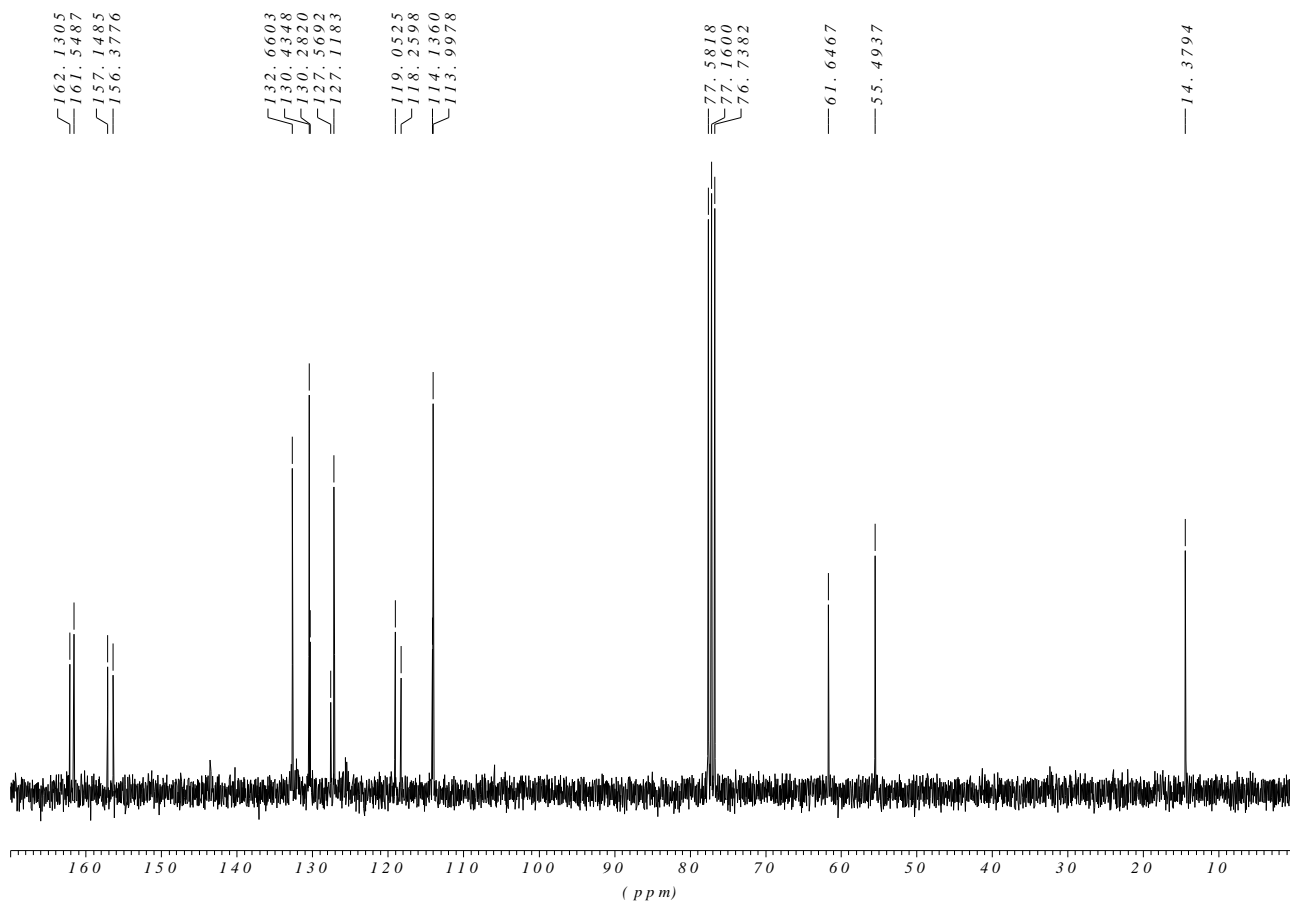

Supplementary Material (ESI) for Chemical Communications  
This journal is © The Royal Society of Chemistry 2010

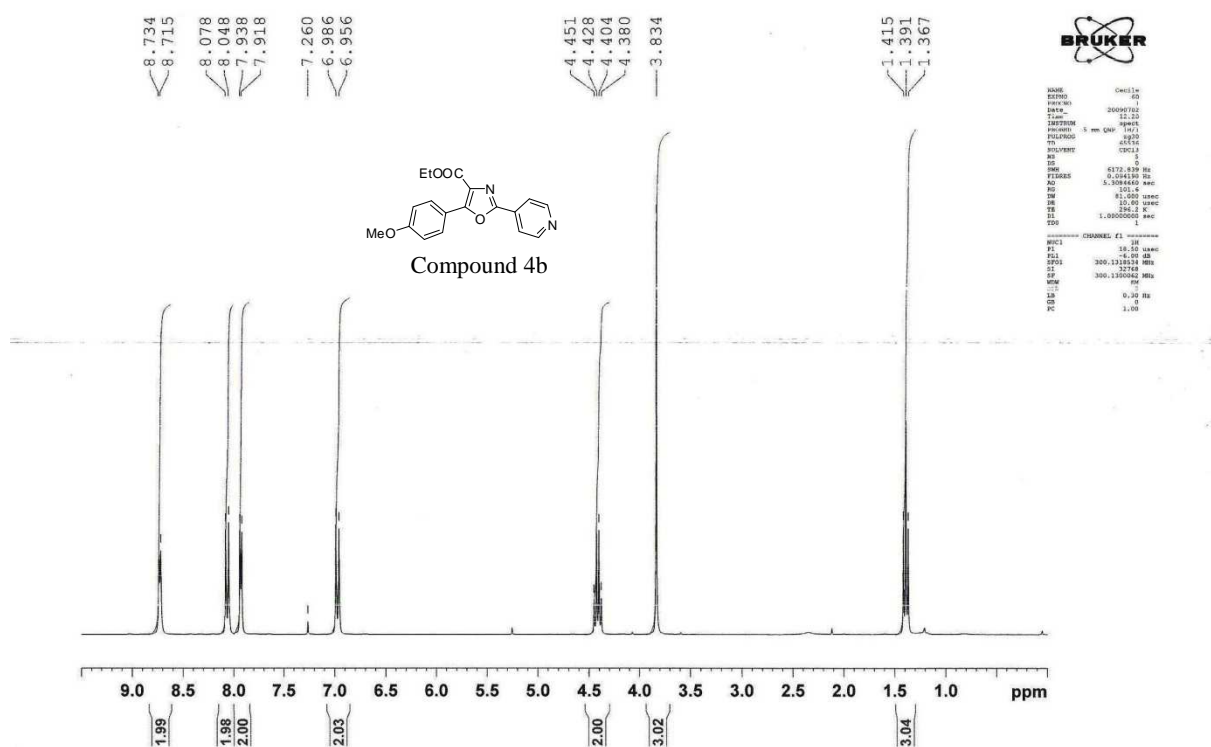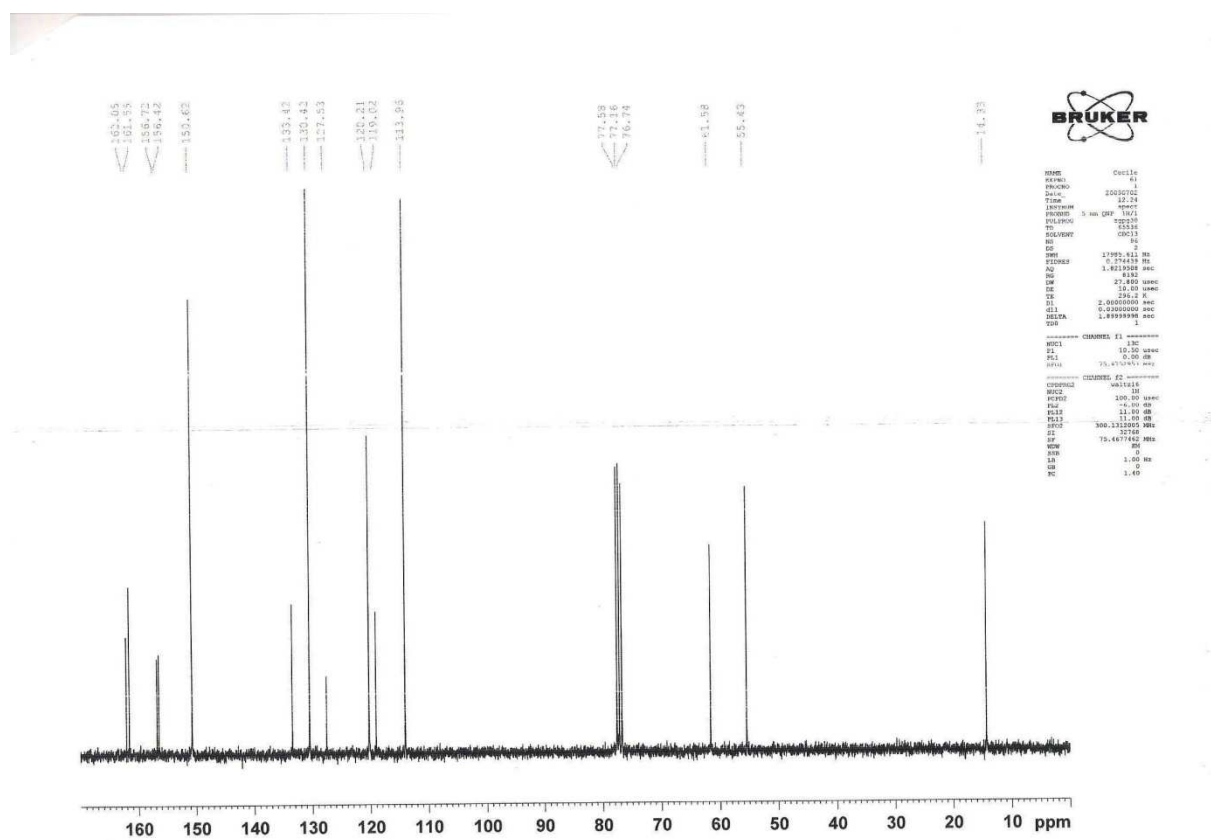

Supplementary Material (ESI) for Chemical Communications  
 This journal is © The Royal Society of Chemistry 2010

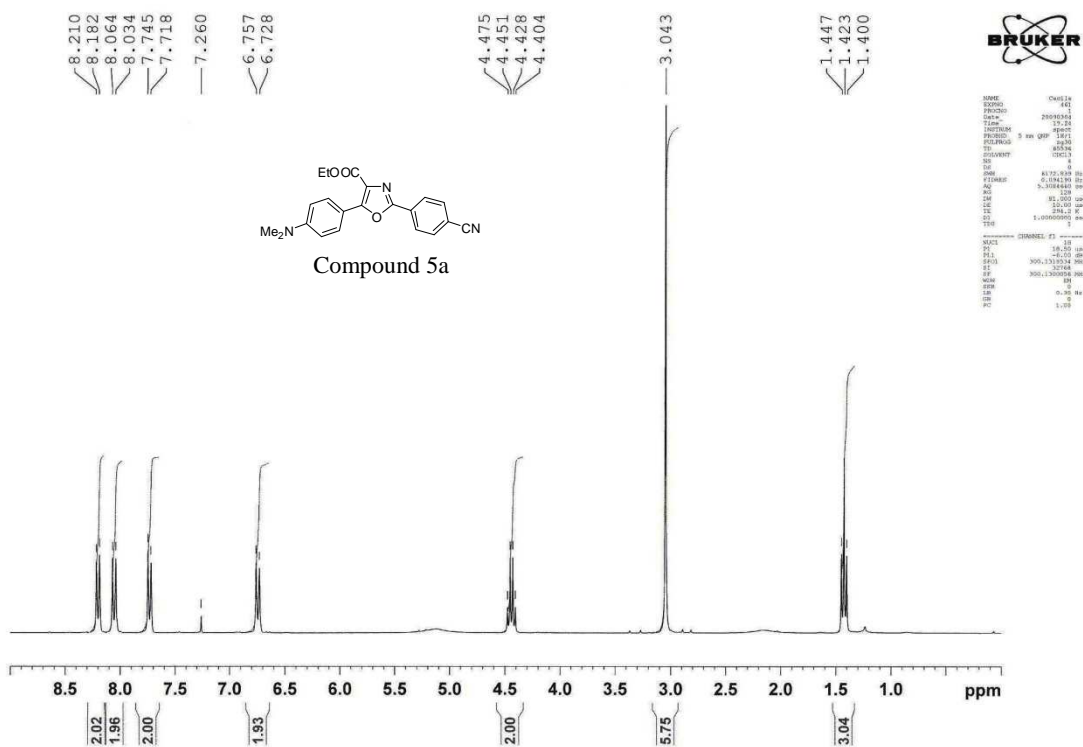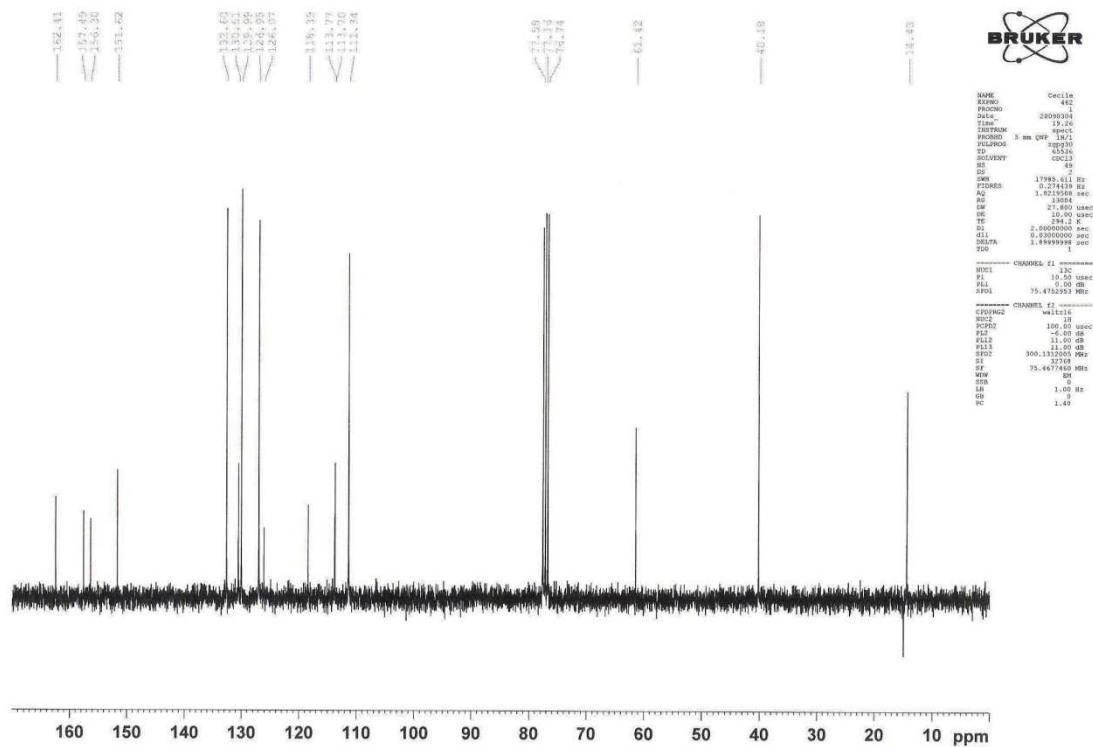



Supplementary Material (ESI) for Chemical Communications  
 This journal is © The Royal Society of Chemistry 2010

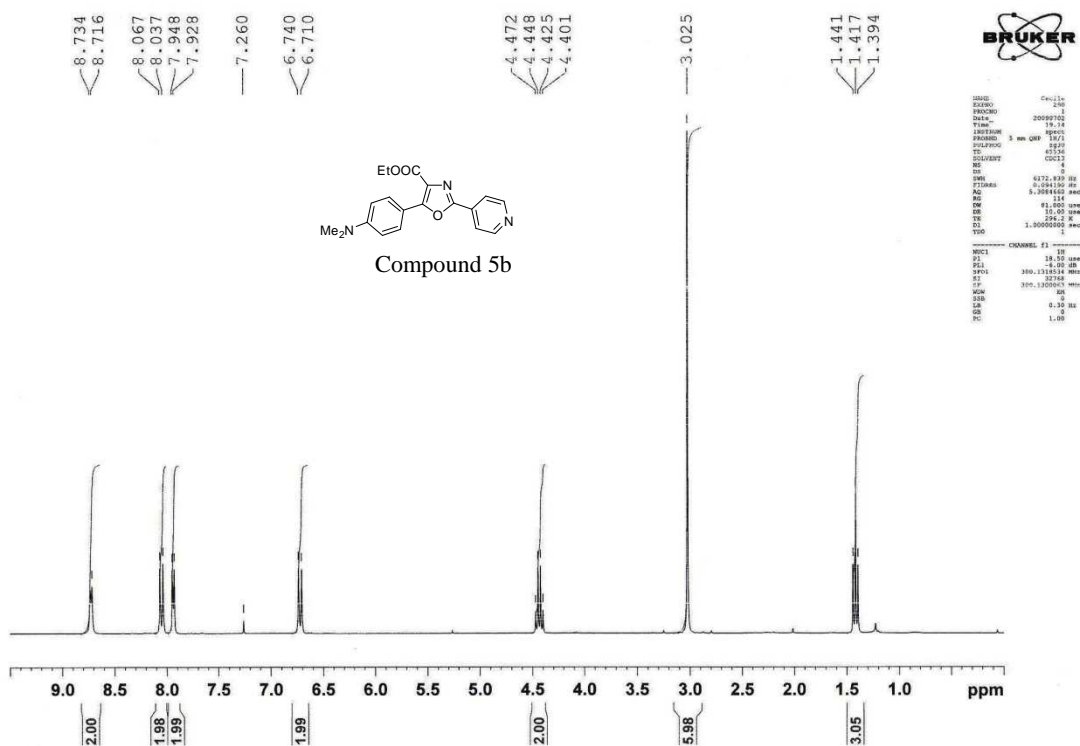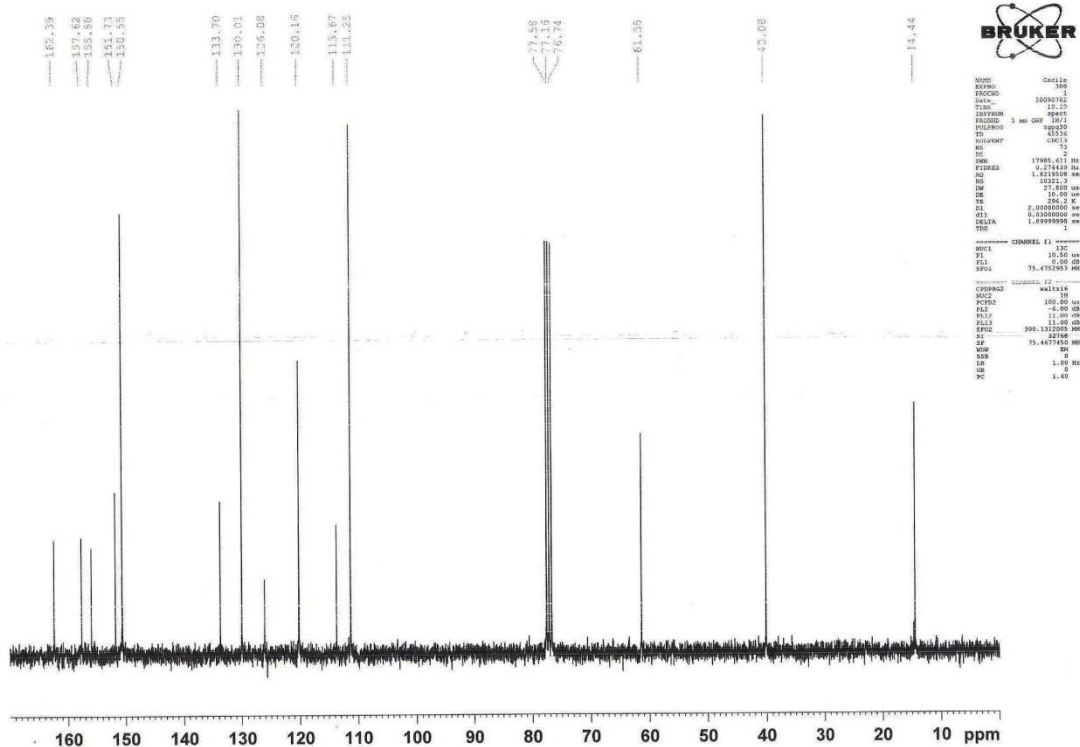

Supplementary Material (ESI) for Chemical Communications  
 This journal is © The Royal Society of Chemistry 2010

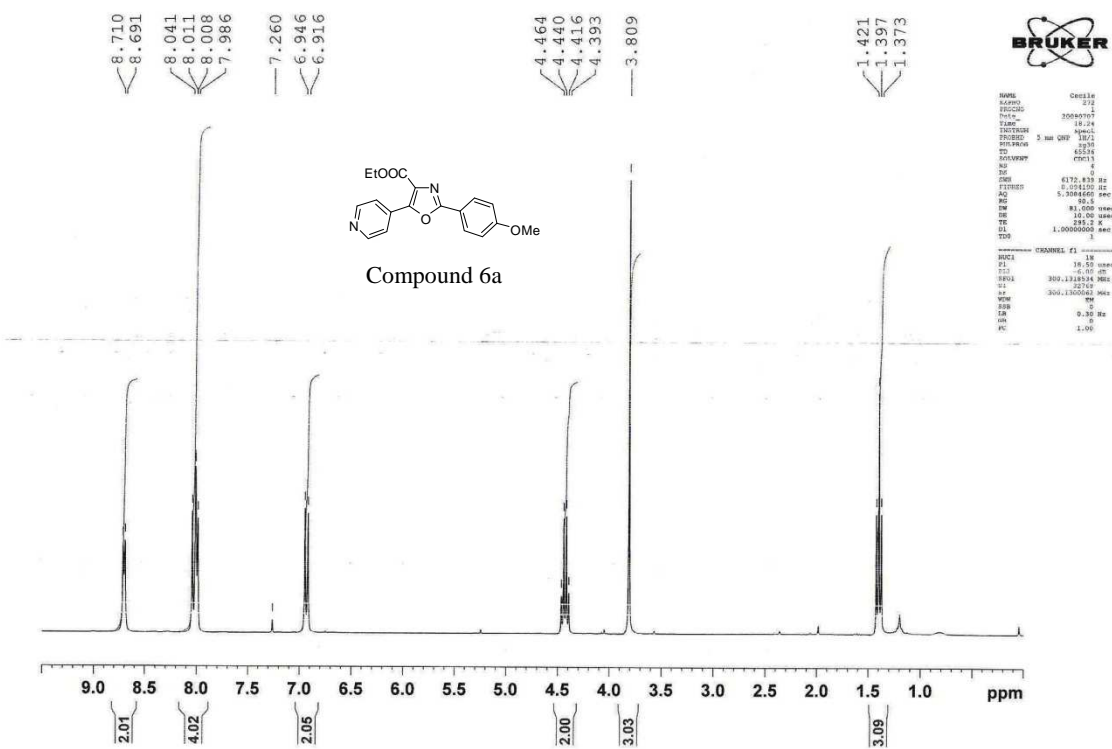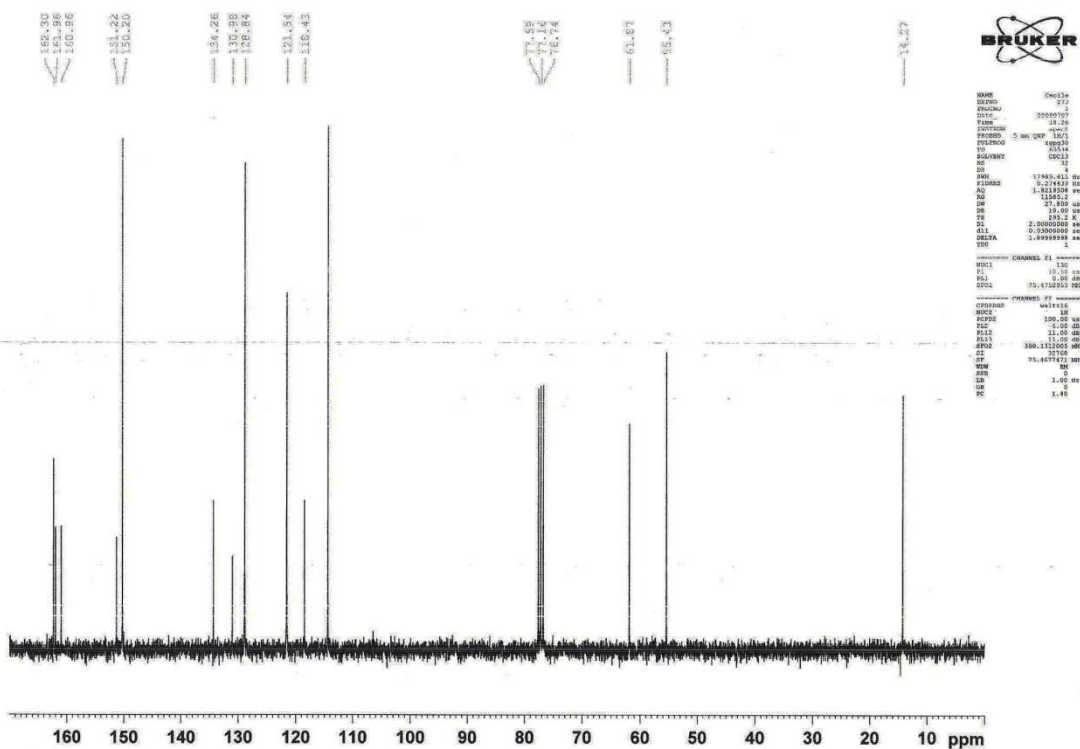

Supplementary Material (ESI) for Chemical Communications  
This journal is © The Royal Society of Chemistry 2010

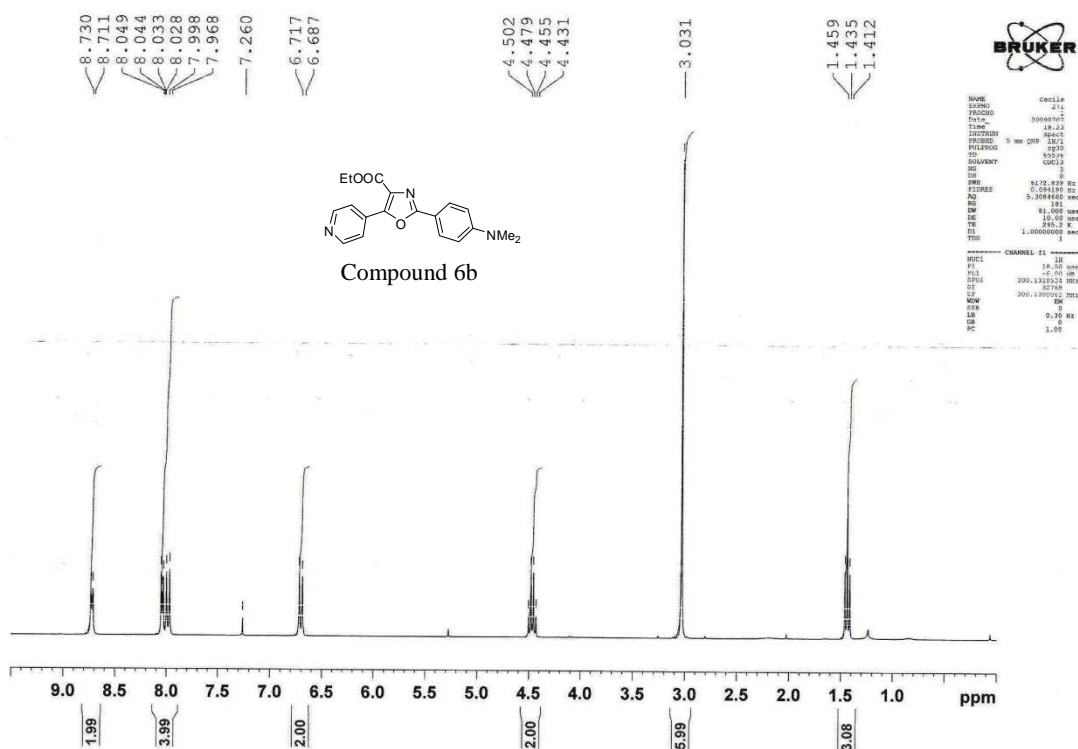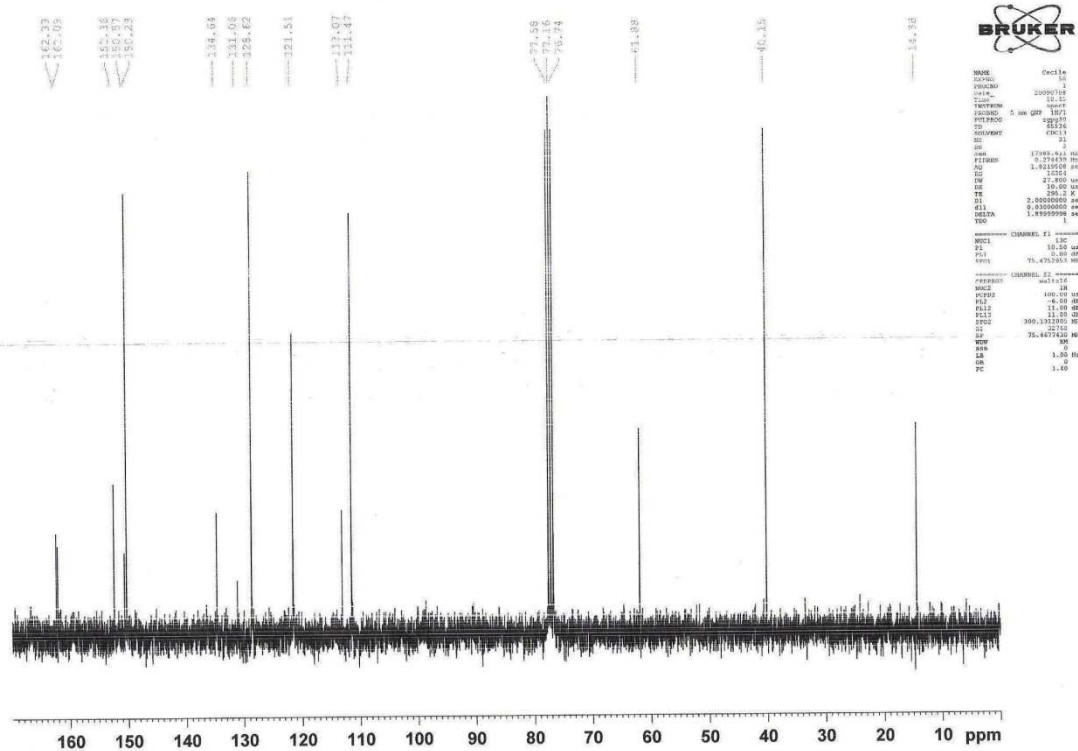

Supplementary Material (ESI) for Chemical Communications  
This journal is © The Royal Society of Chemistry 2010

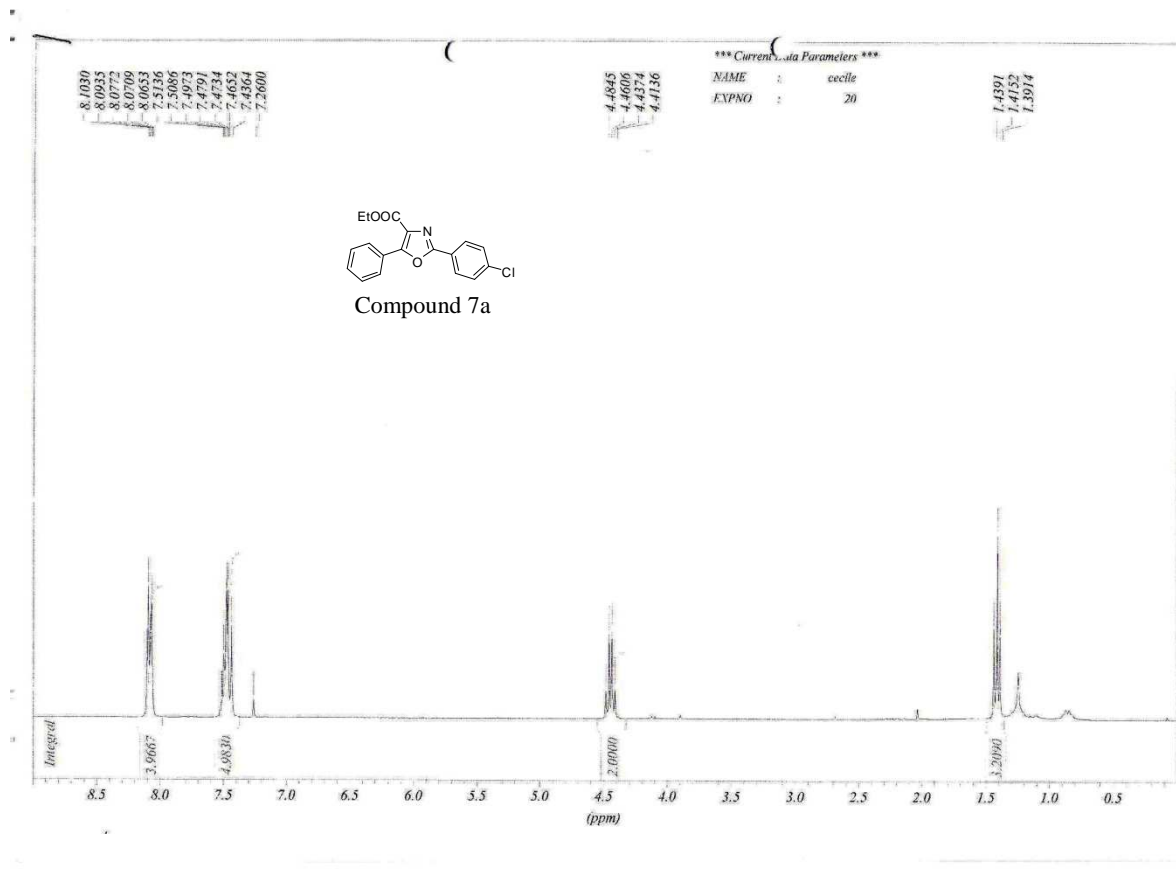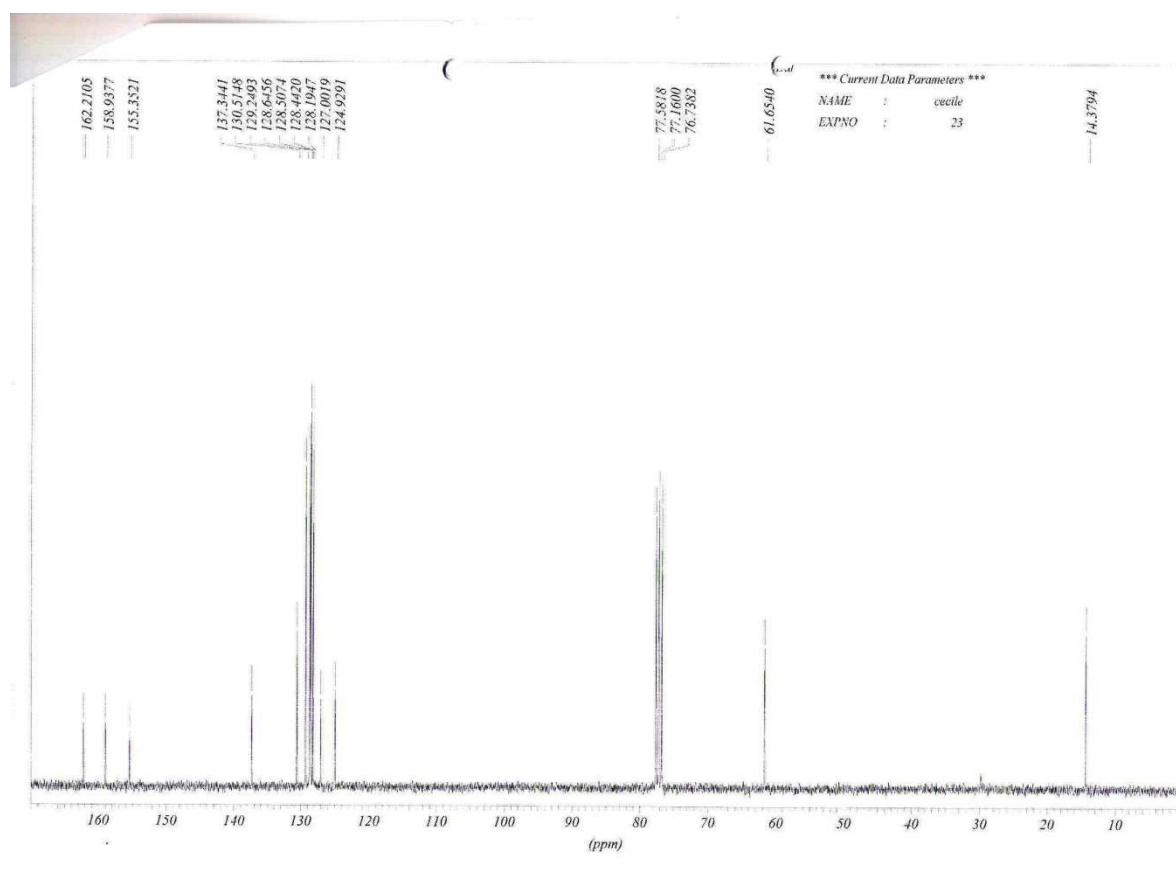

Supplementary Material (ESI) for Chemical Communications  
This journal is © The Royal Society of Chemistry 2010

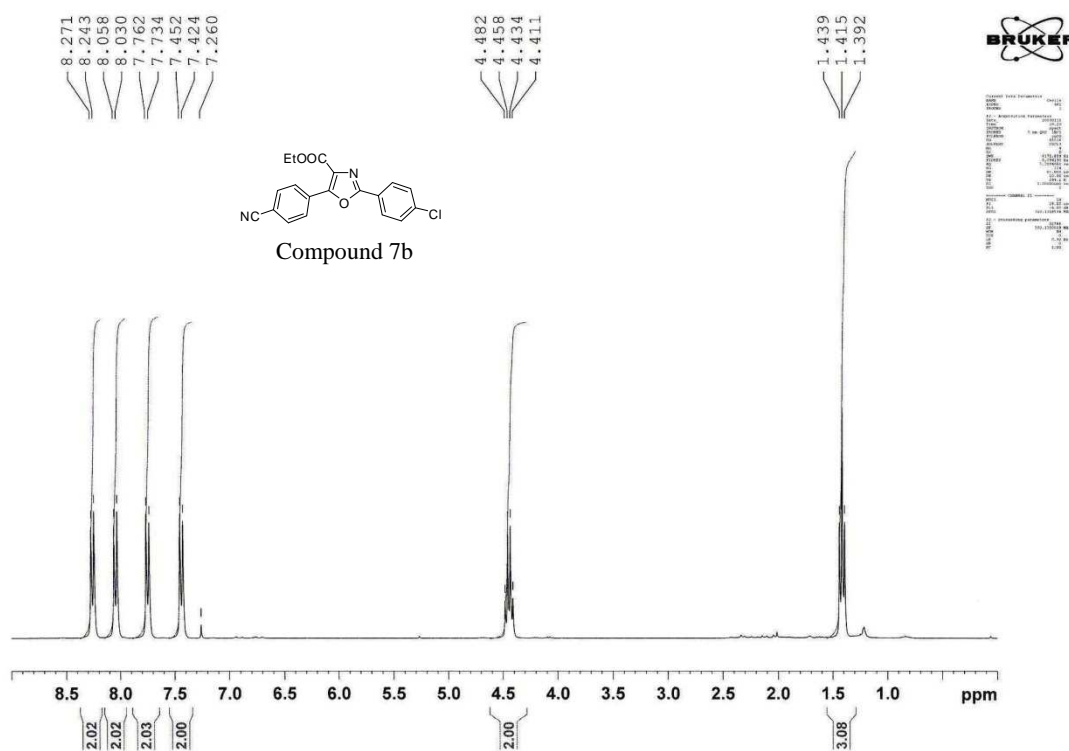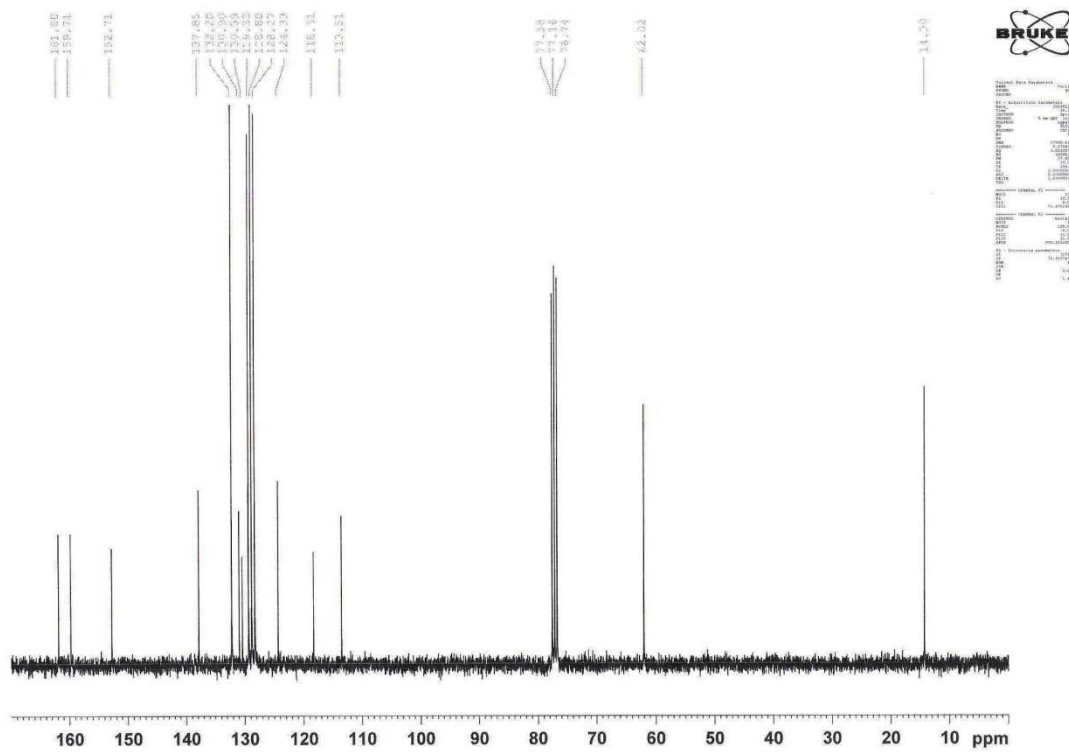

Supplementary Material (ESI) for Chemical Communications  
 This journal is © The Royal Society of Chemistry 2010

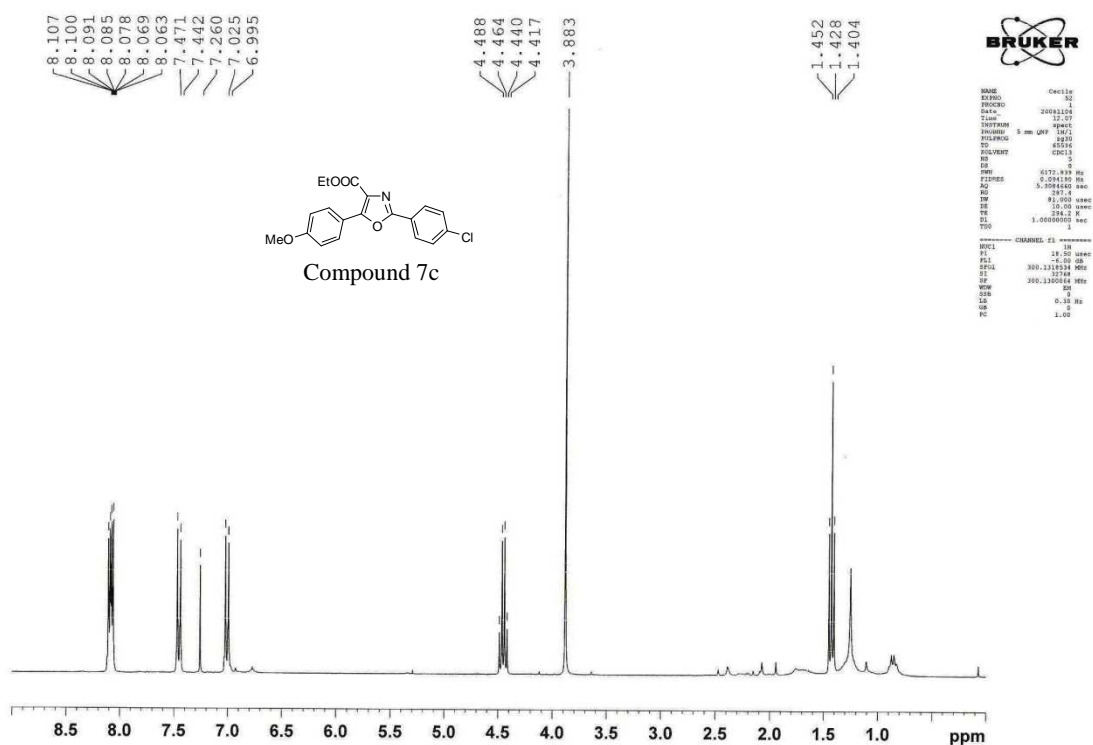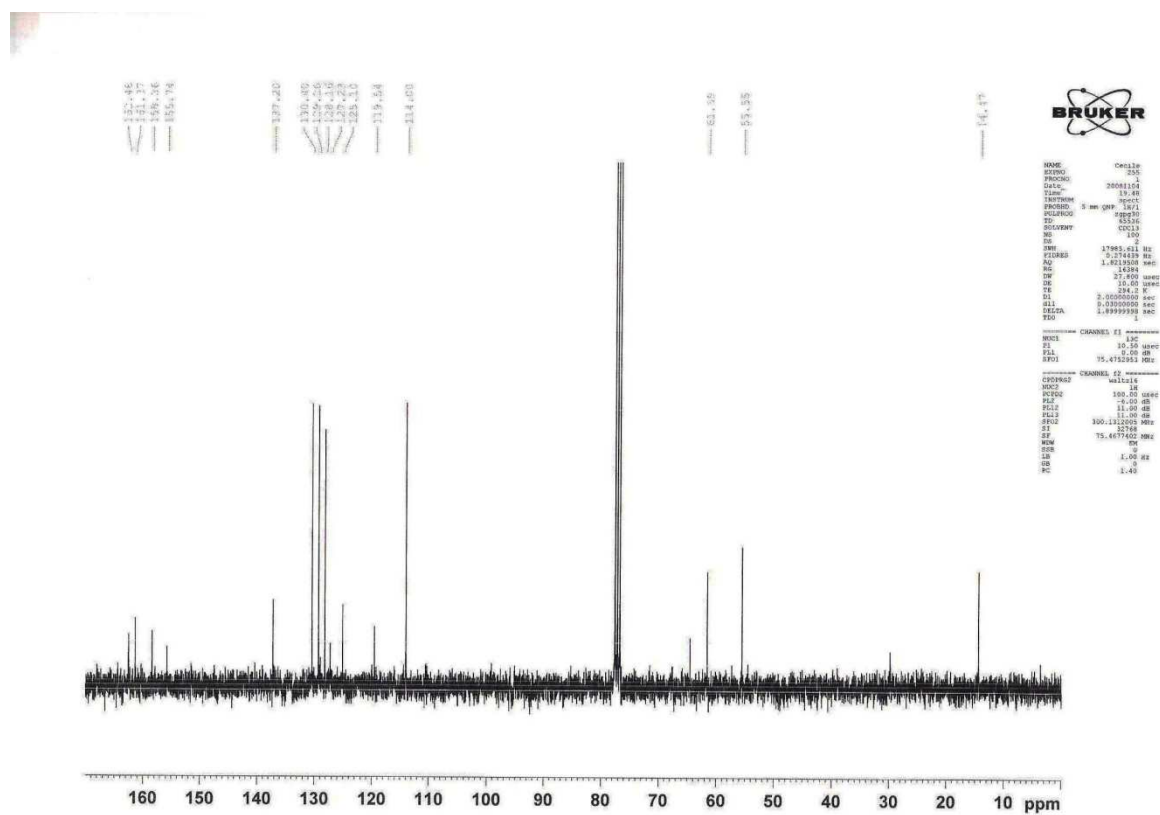

Supplementary Material (ESI) for Chemical Communications  
This journal is © The Royal Society of Chemistry 2010

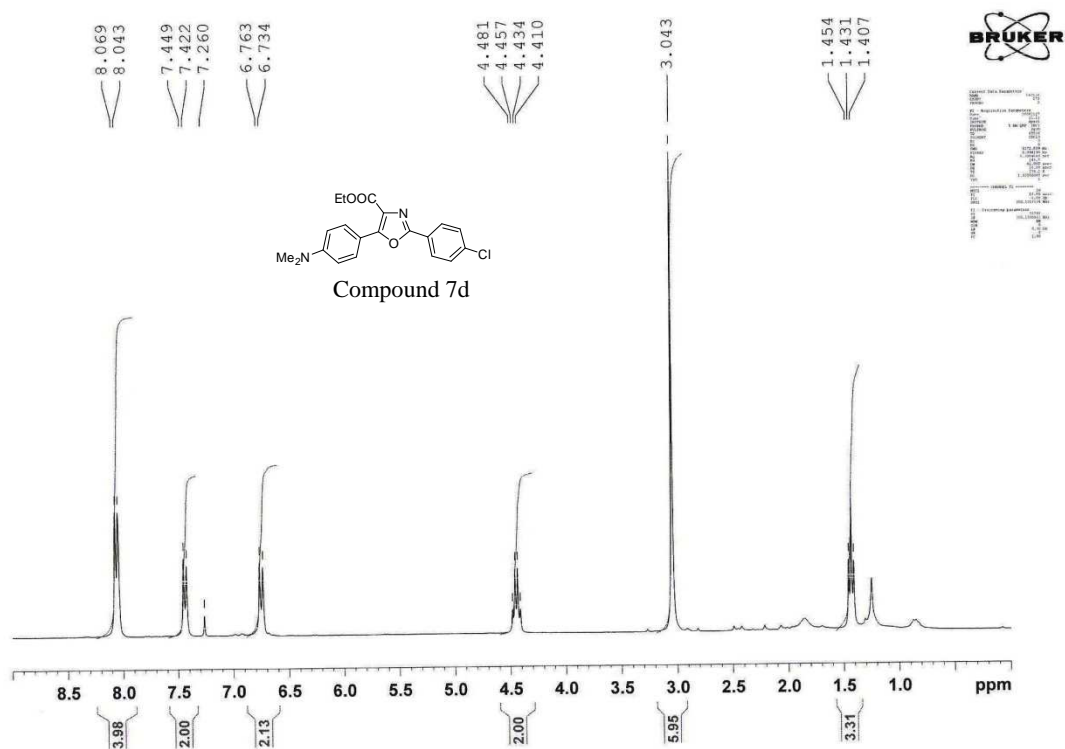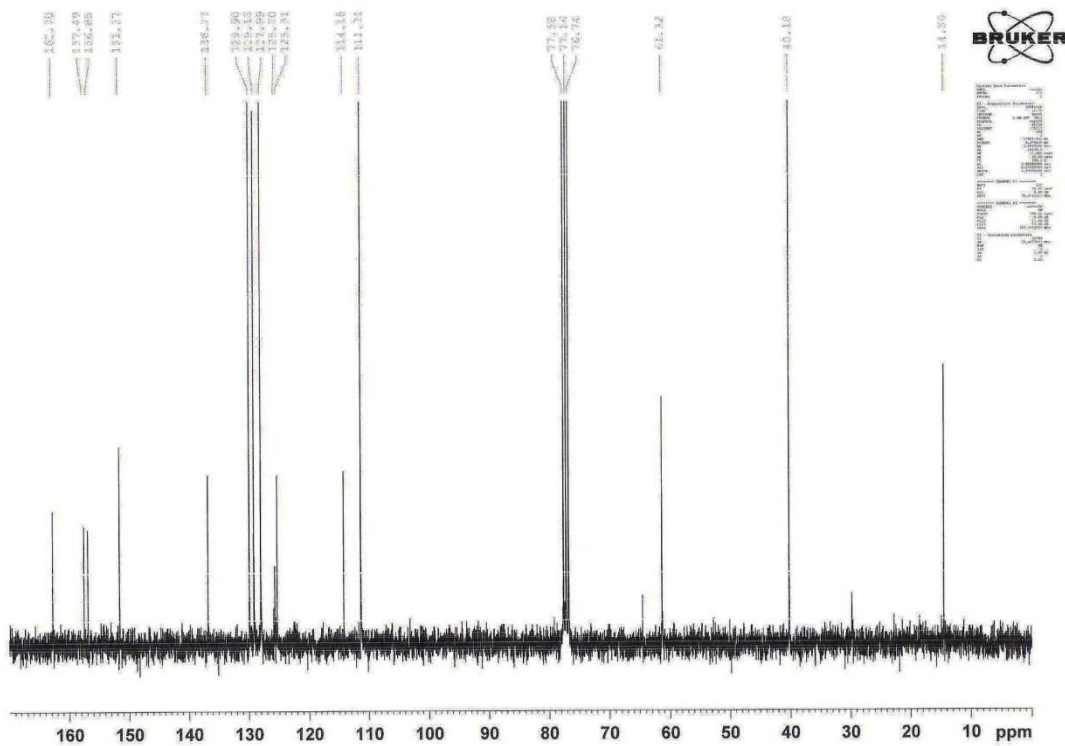

Supplementary Material (ESI) for Chemical Communications  
This journal is © The Royal Society of Chemistry 2010

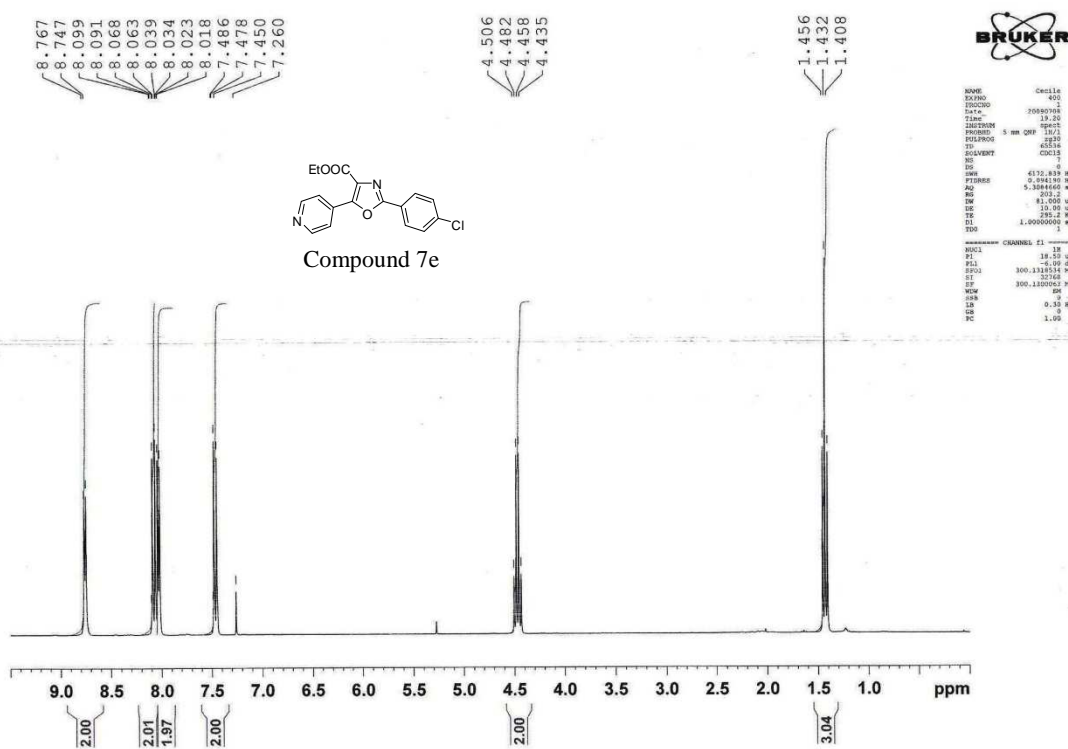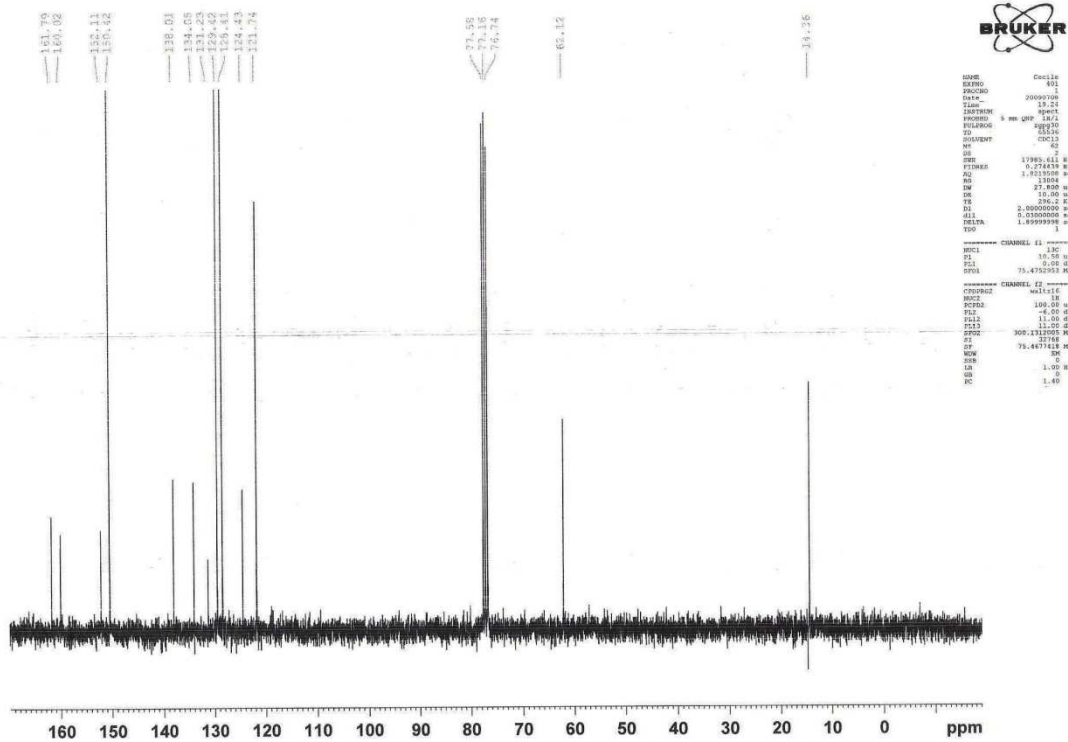



Supplementary Material (ESI) for Chemical Communications  
This journal is © The Royal Society of Chemistry 2010

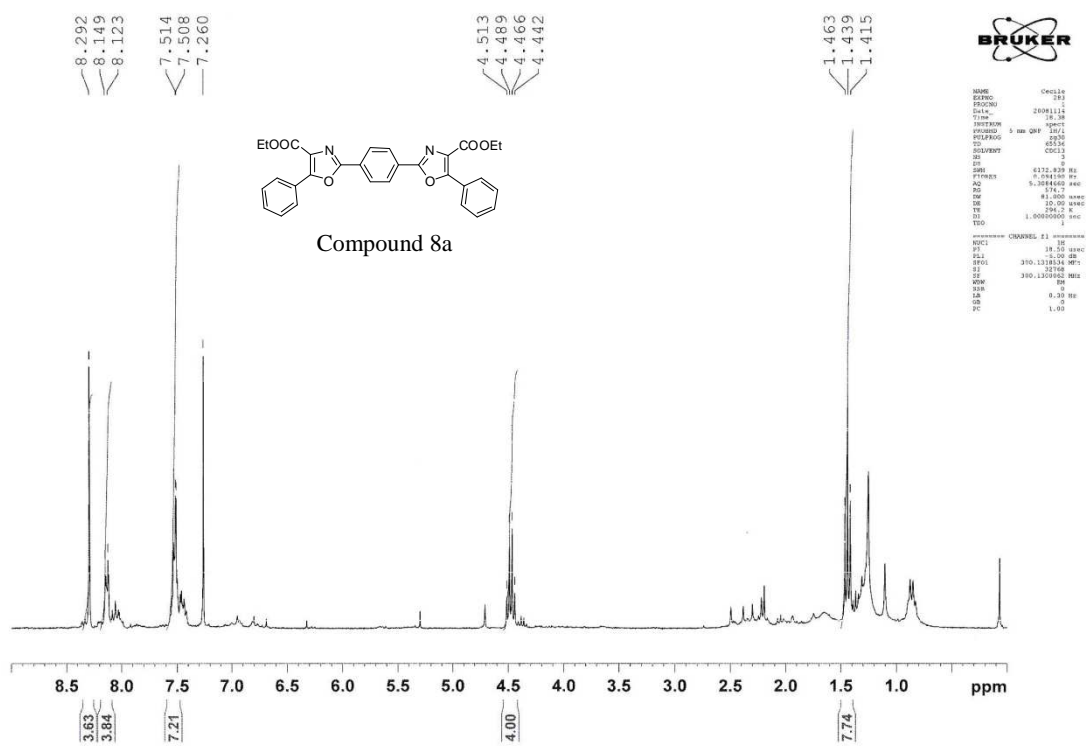

Supplementary Material (ESI) for Chemical Communications  
 This journal is © The Royal Society of Chemistry 2010

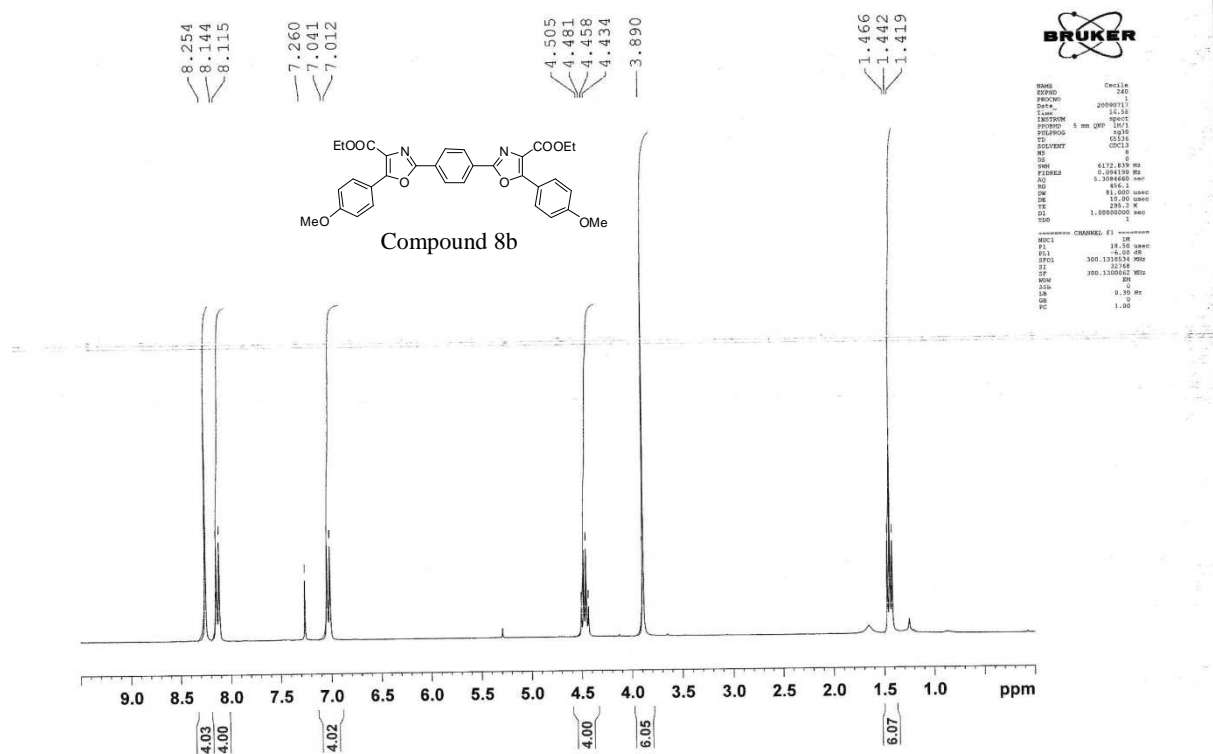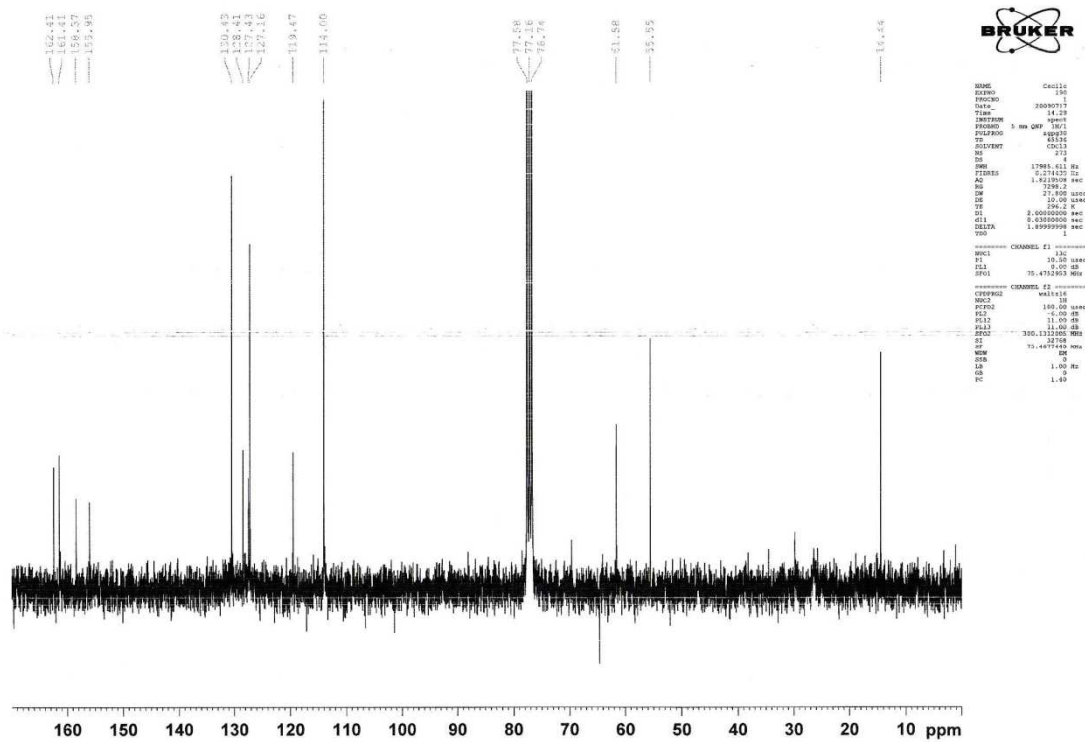

Supplementary Material (ESI) for Chemical Communications  
This journal is © The Royal Society of Chemistry 2010

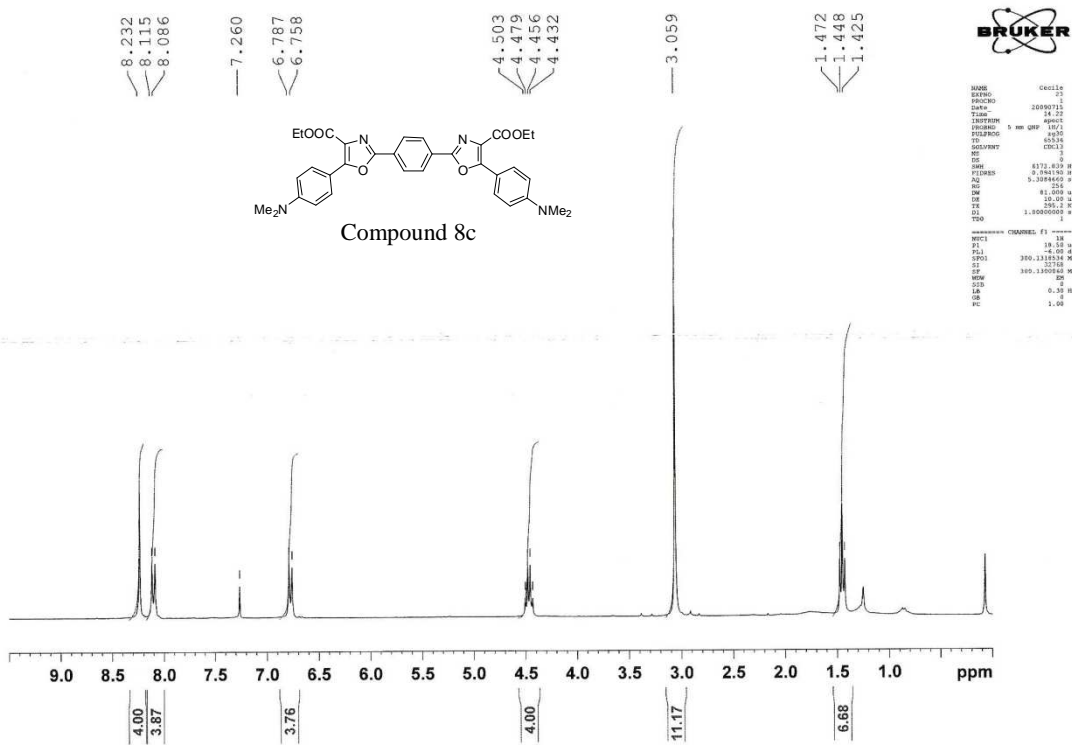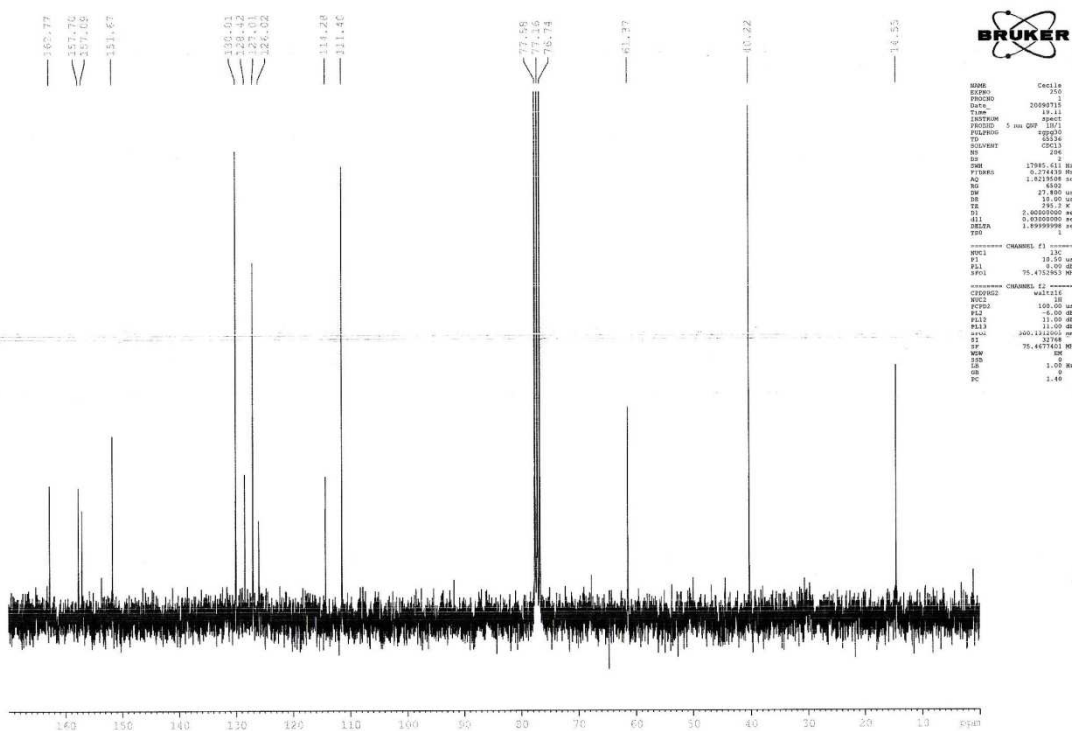

Supplementary Material (ESI) for Chemical Communications  
This journal is © The Royal Society of Chemistry 2010

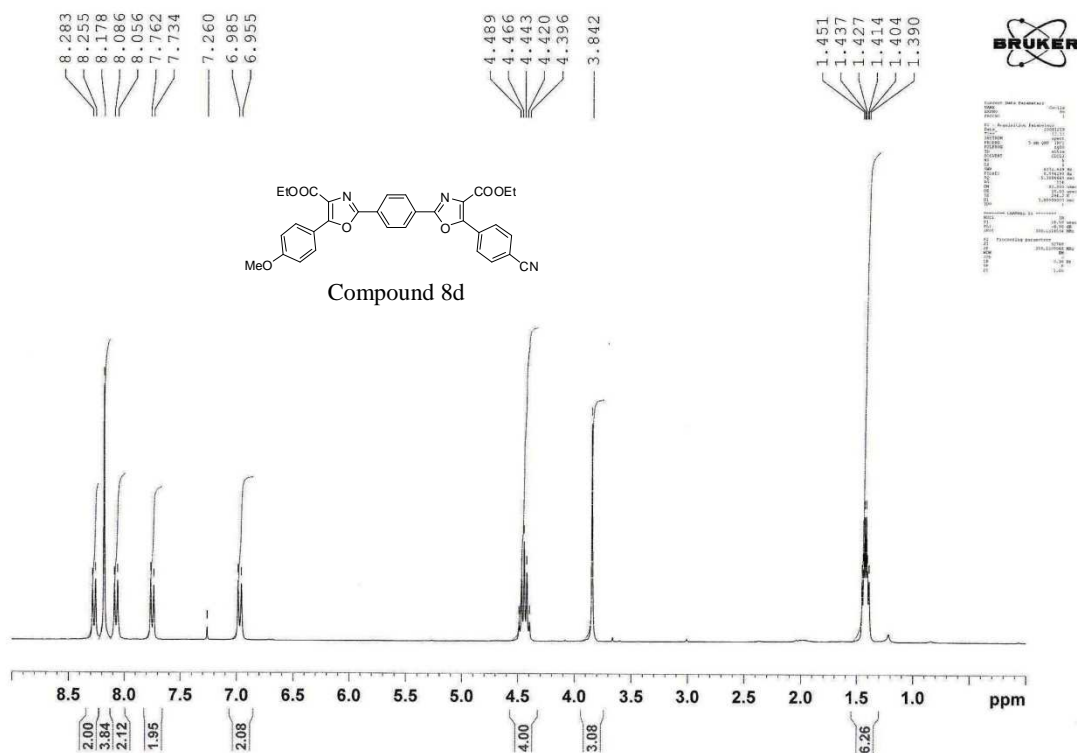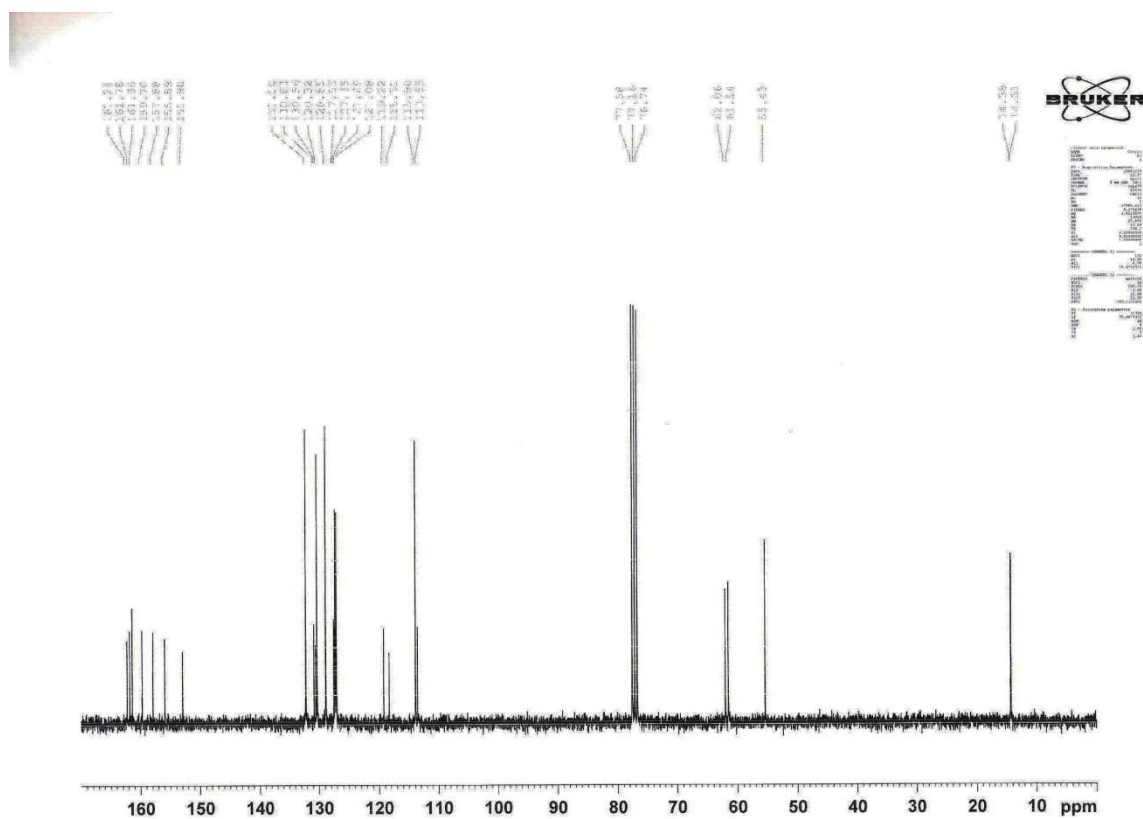

Supplementary Material (ESI) for Chemical Communications  
This journal is © The Royal Society of Chemistry 2010

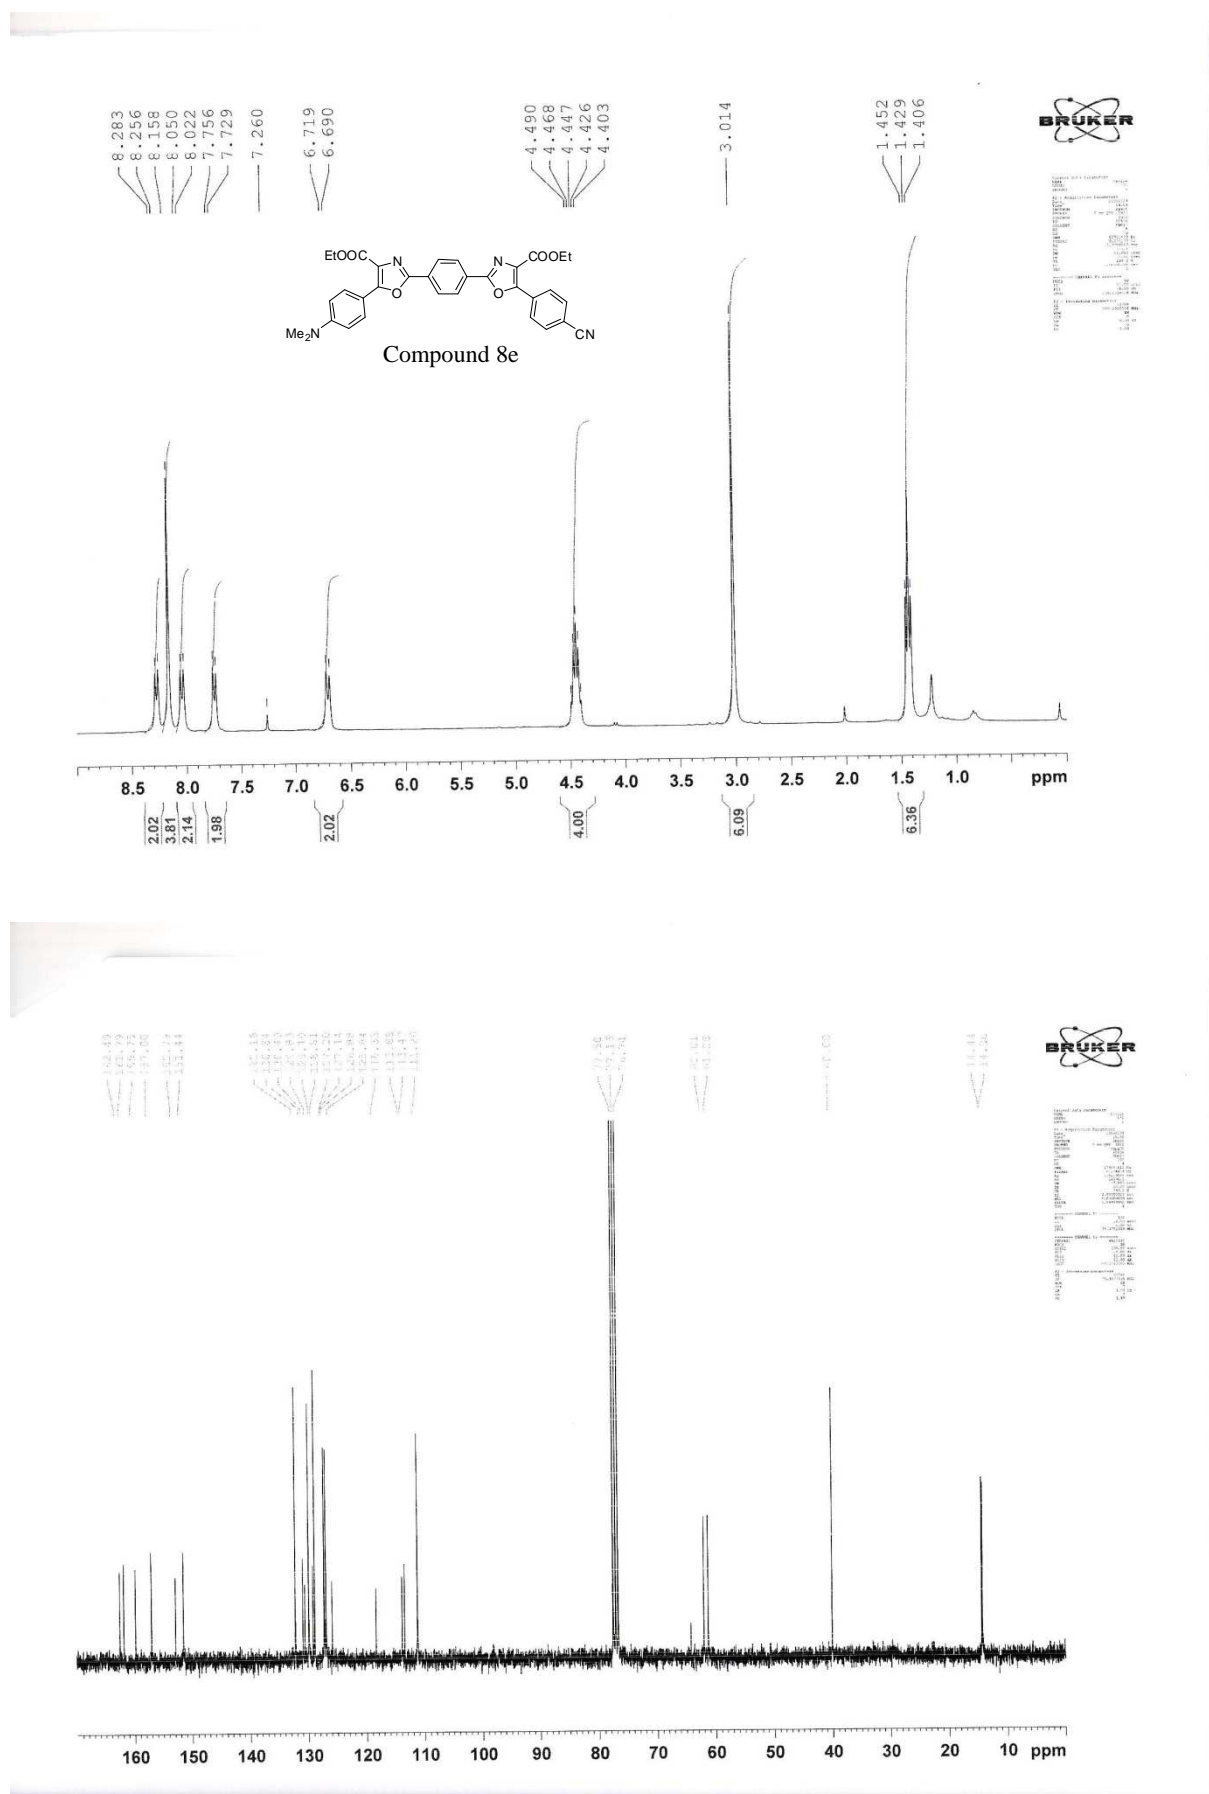

Supplementary Material (ESI) for Chemical Communications  
This journal is © The Royal Society of Chemistry 2010

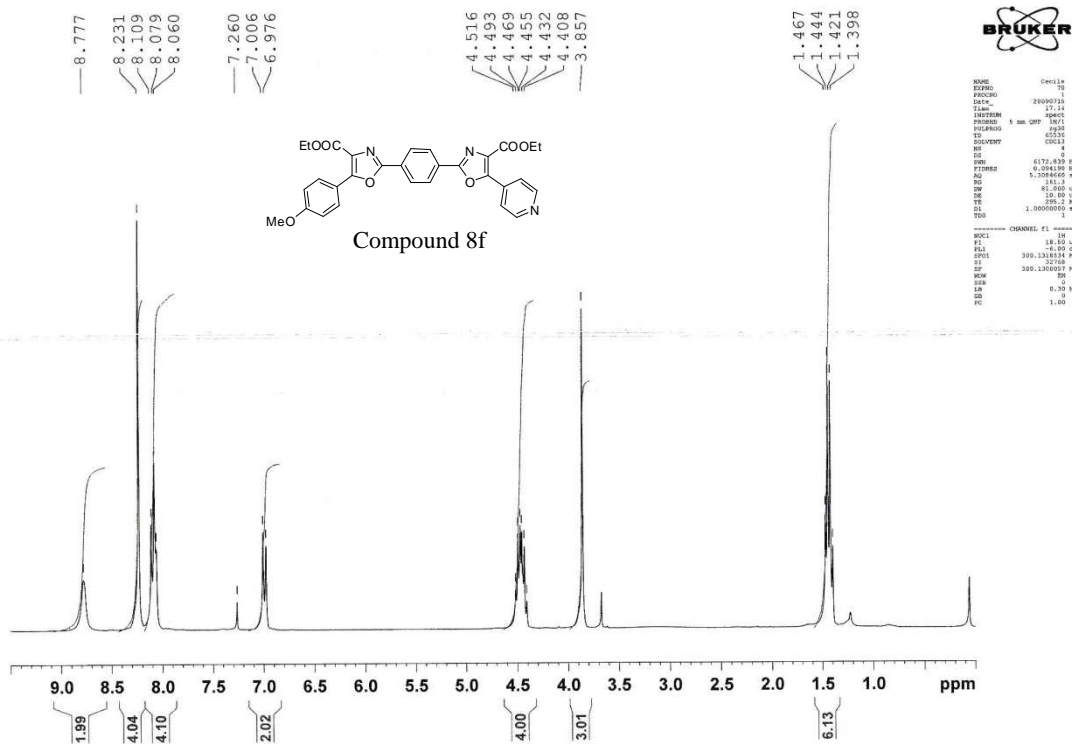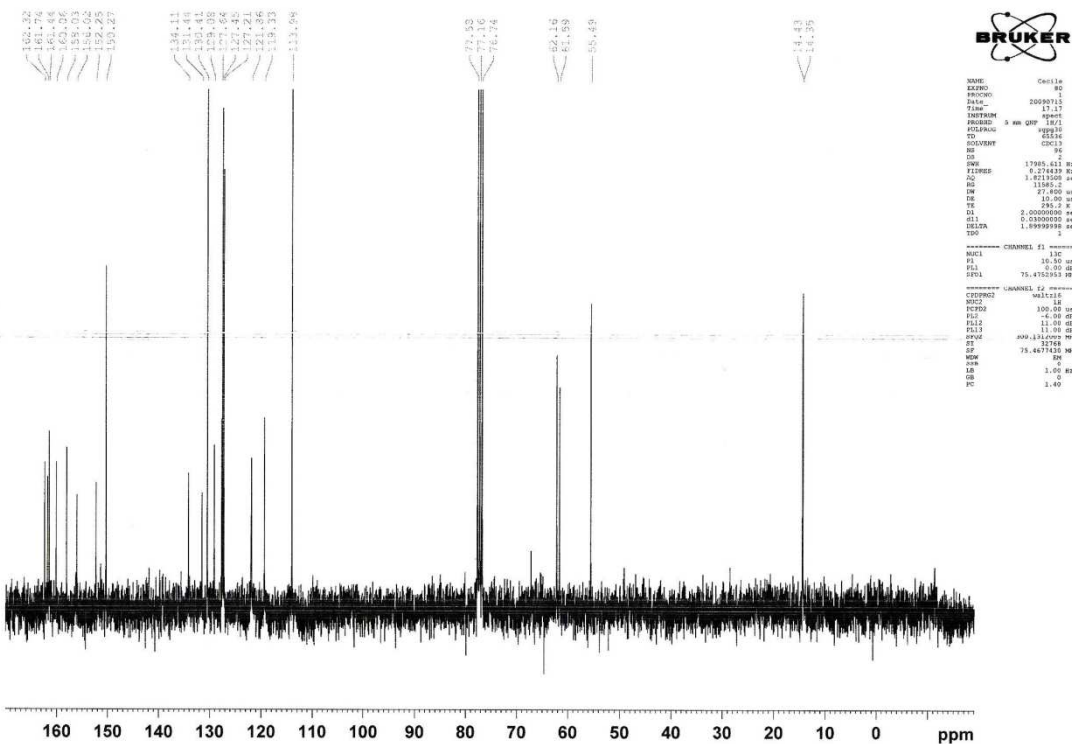

Supplementary Material (ESI) for Chemical Communications  
This journal is © The Royal Society of Chemistry 2010

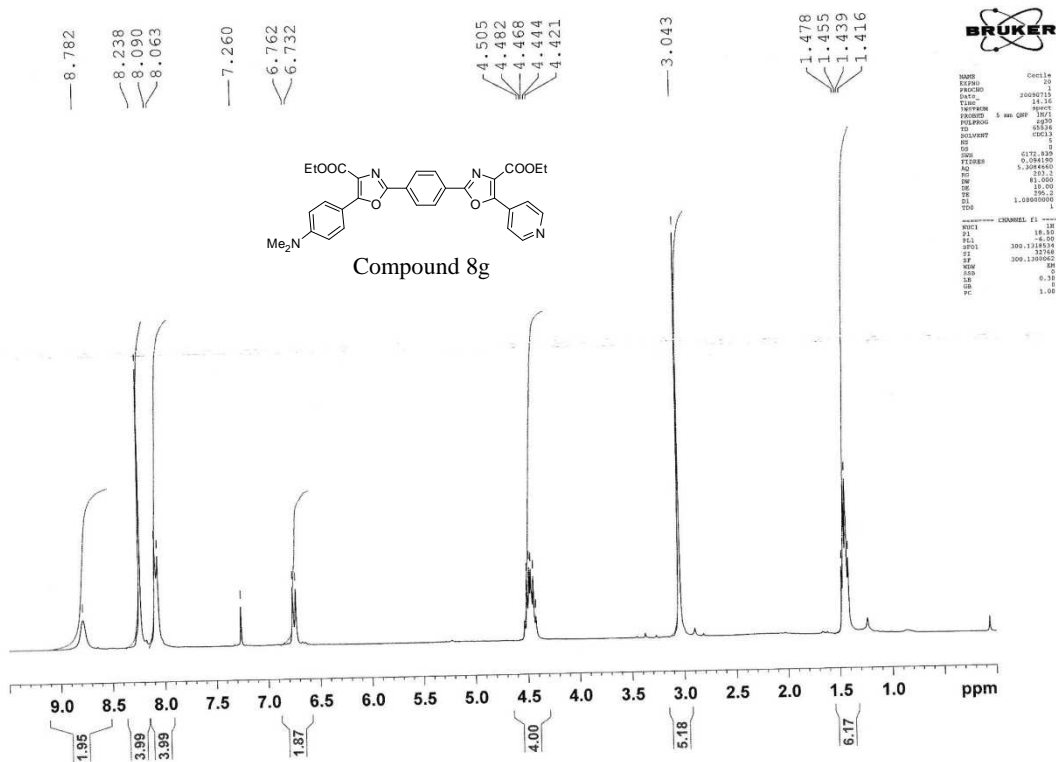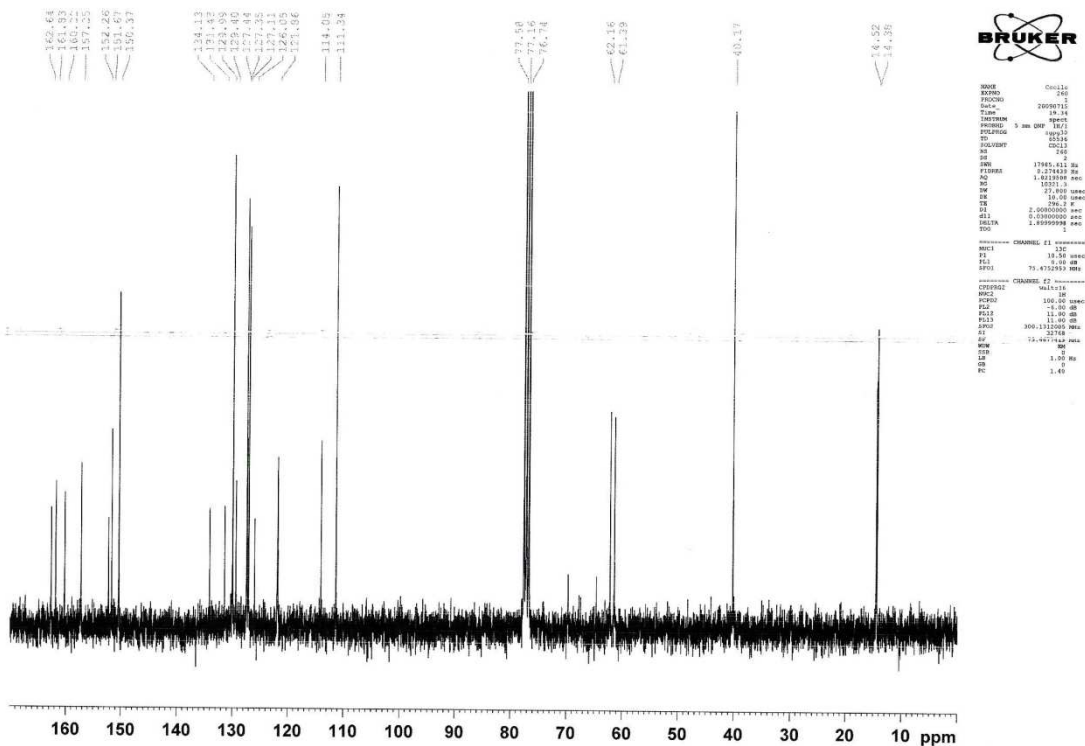

Supplement: c1ob05261f.pdf [file c1ob05261f.pdf]
